# Supplementary material for: One-pot synthesis of 1H-isochromenes and 1,2-dihydroisoquinolines by a sequential isocyanide-based multicomponent/Wittig reaction
Source: Royal Society of Chemistry journal article supplement (doi:10.1039/c5ob02405f), 2016-01-01

## Supporting Information

### One-pot Synthesis of 1*H*-Isochromenes and 1,2-Dihydroisoquinolines by a Sequential Isocyanide-based Multicomponent/Wittig Reaction

Long Wang,<sup>a,b</sup> Zhi-Rong Guan,<sup>a</sup> and Ming-Wu Ding<sup>a,\*</sup>

<sup>a</sup>Key Laboratory of Pesticide & Chemical Biology of Ministry of Education, Central China Normal University, Wuhan 430079, P. R. China

<sup>b</sup>College of Materials and Chemical Engineering, China Three Gorges University, Yichang, Hubei 443002, P. R. China.

*mwding@mail.ccnu.edu.cn*

Copies of <sup>1</sup>H and <sup>13</sup>C NMR spectrum of compound **7a-7q**, **9a-9o**

S2-S33

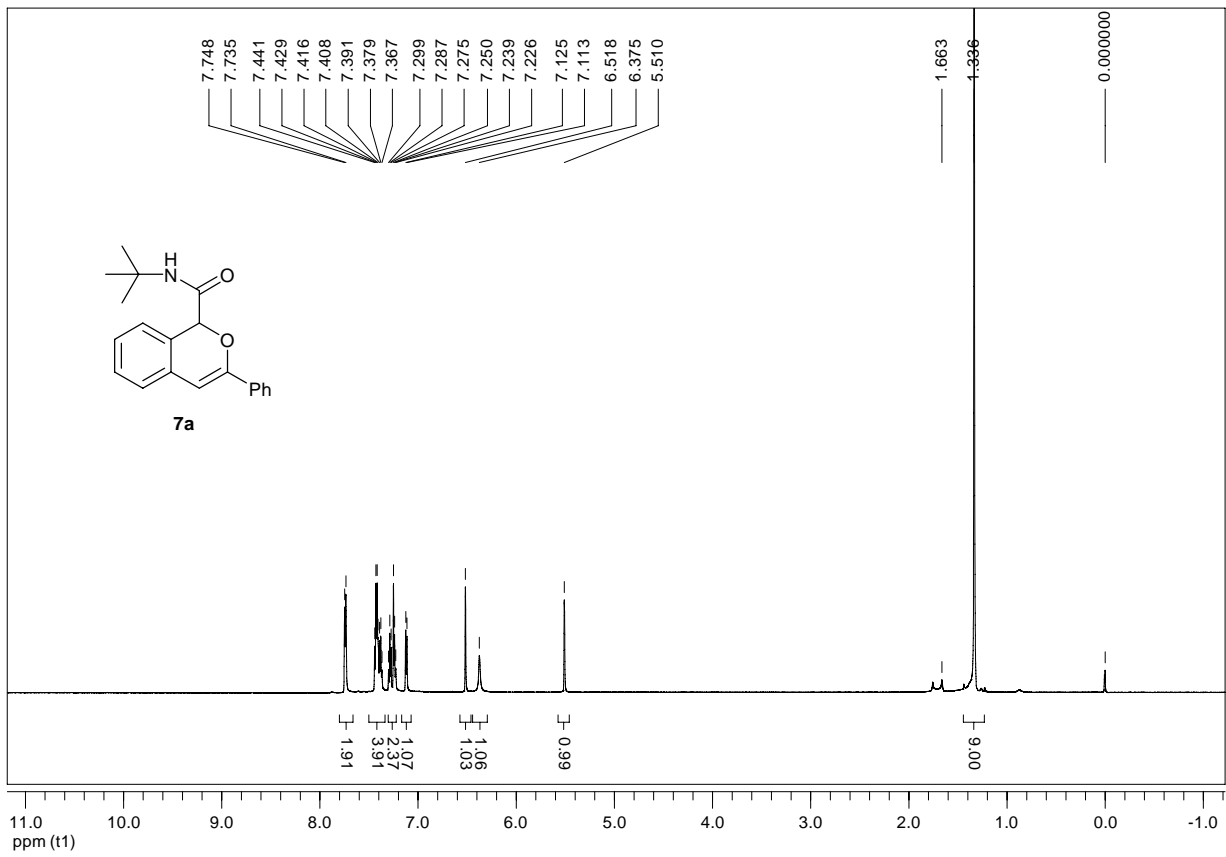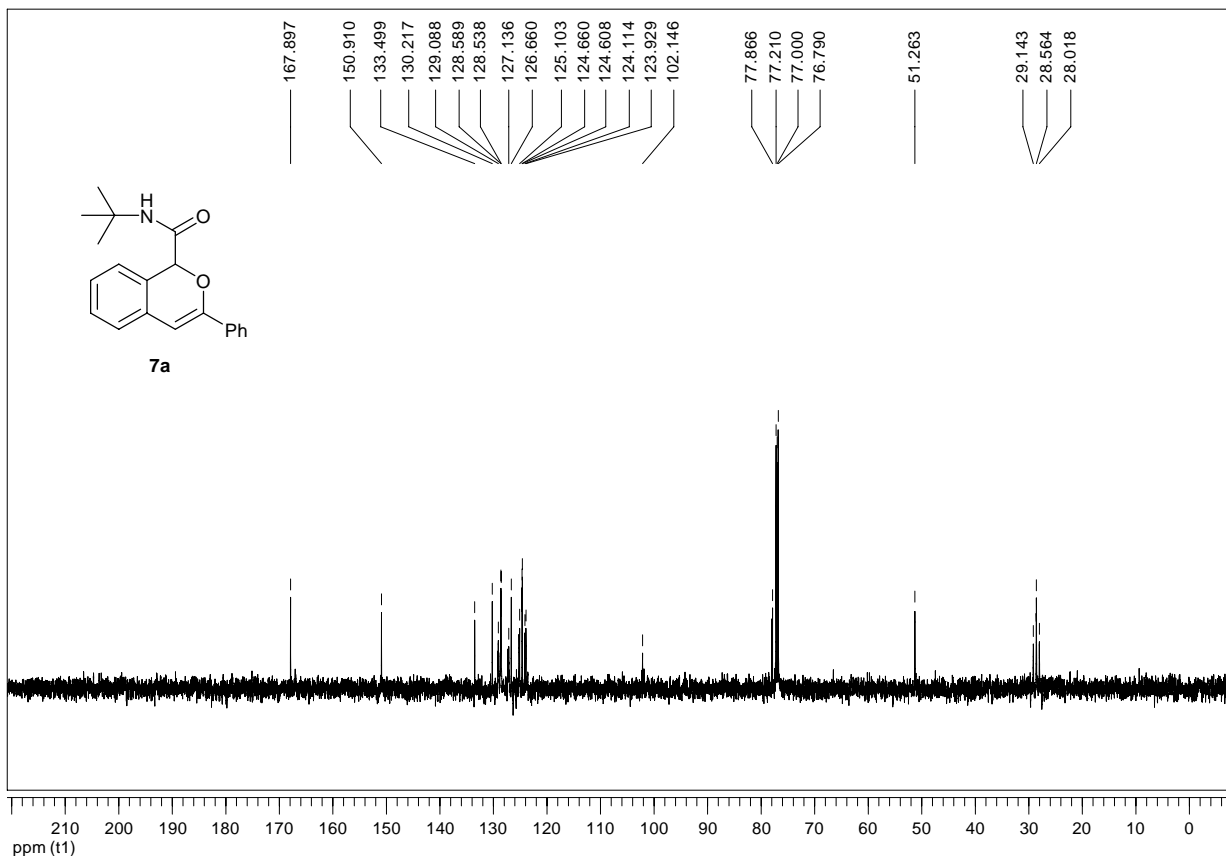

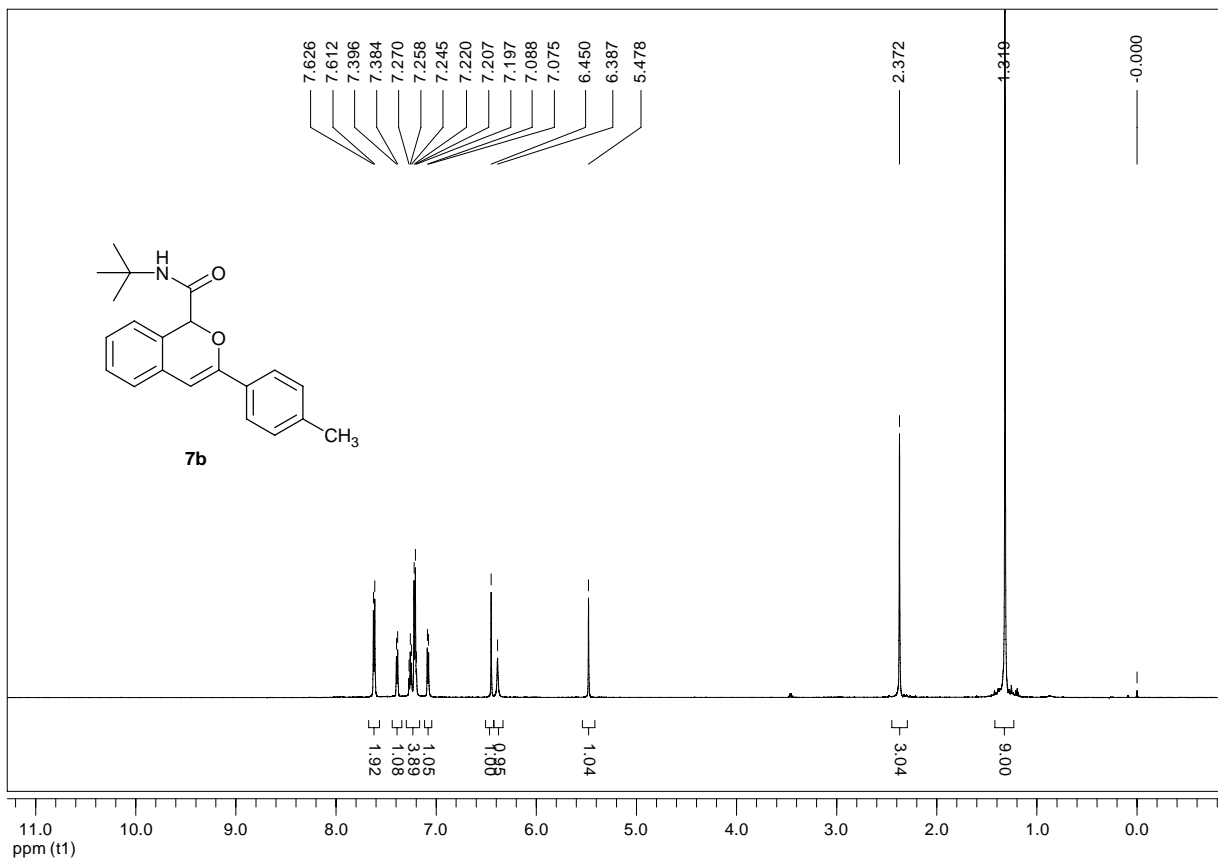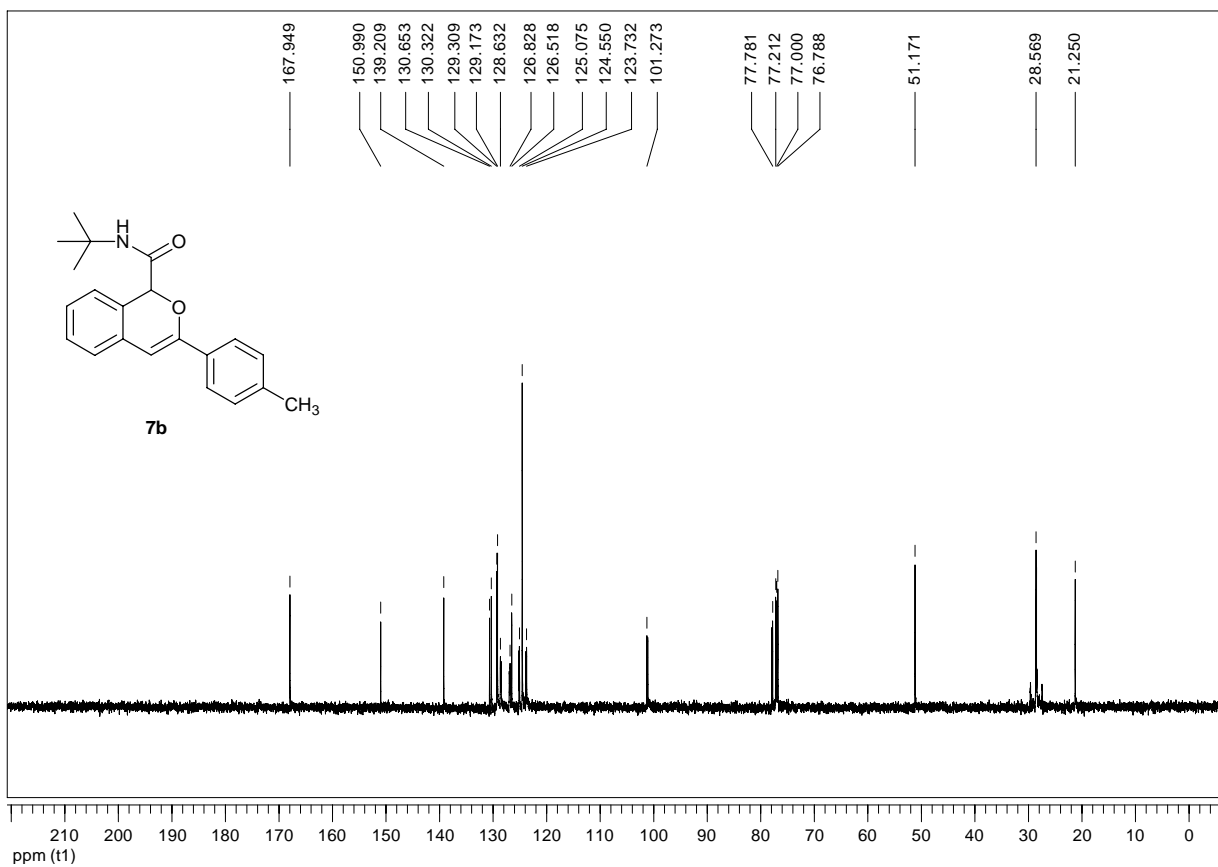

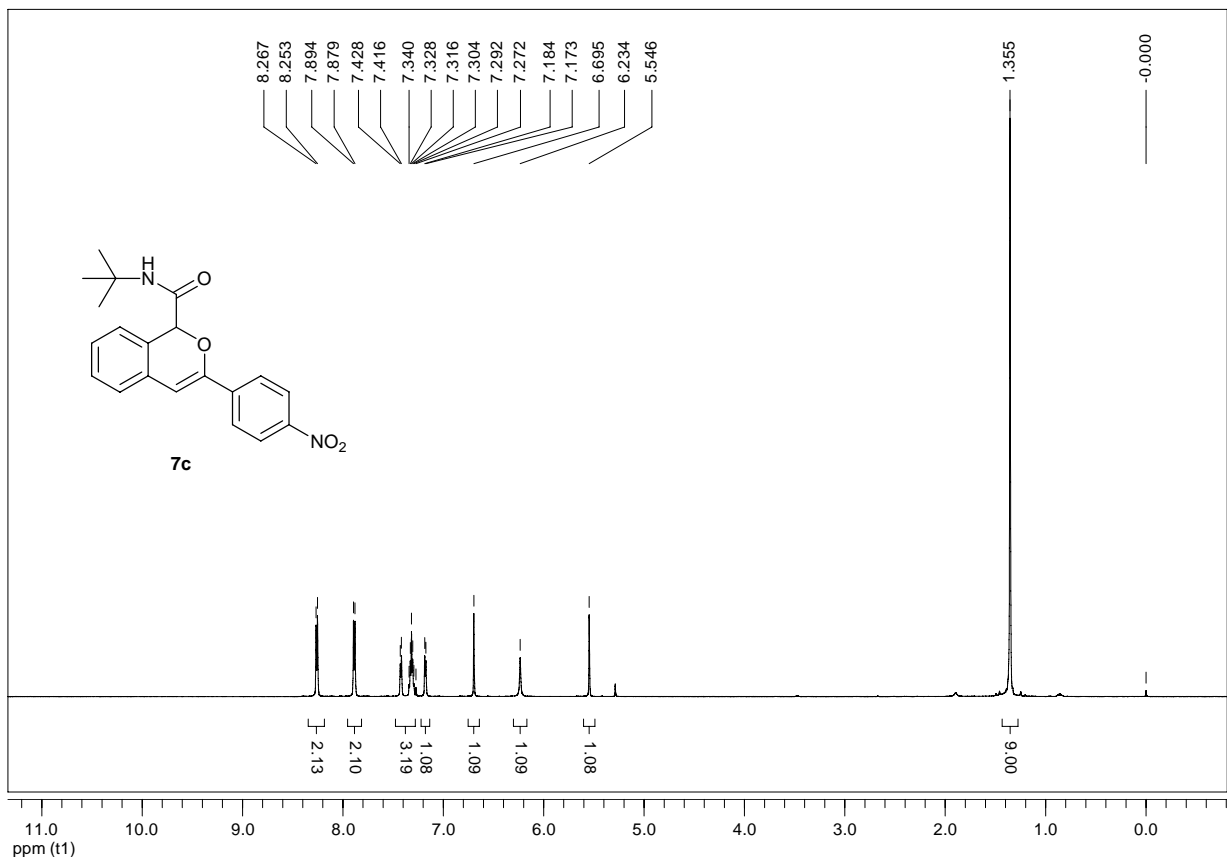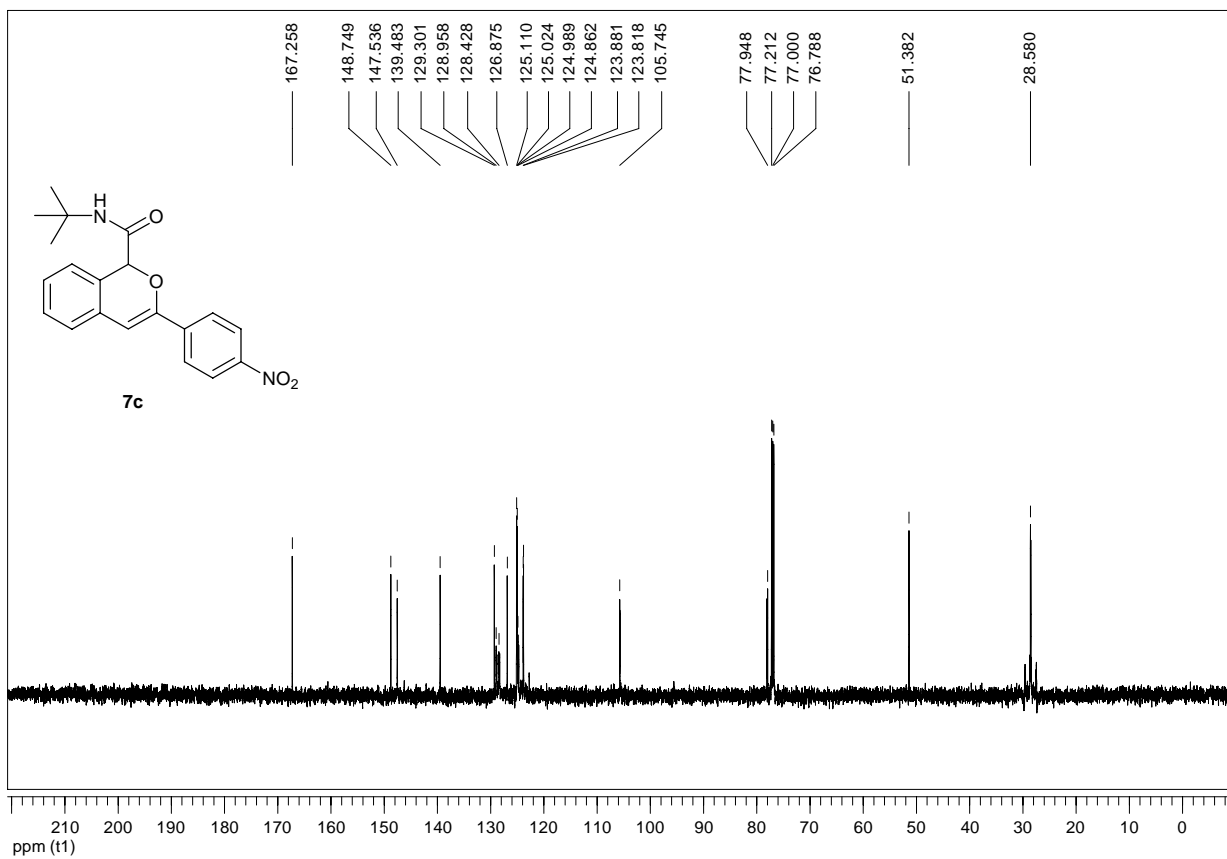

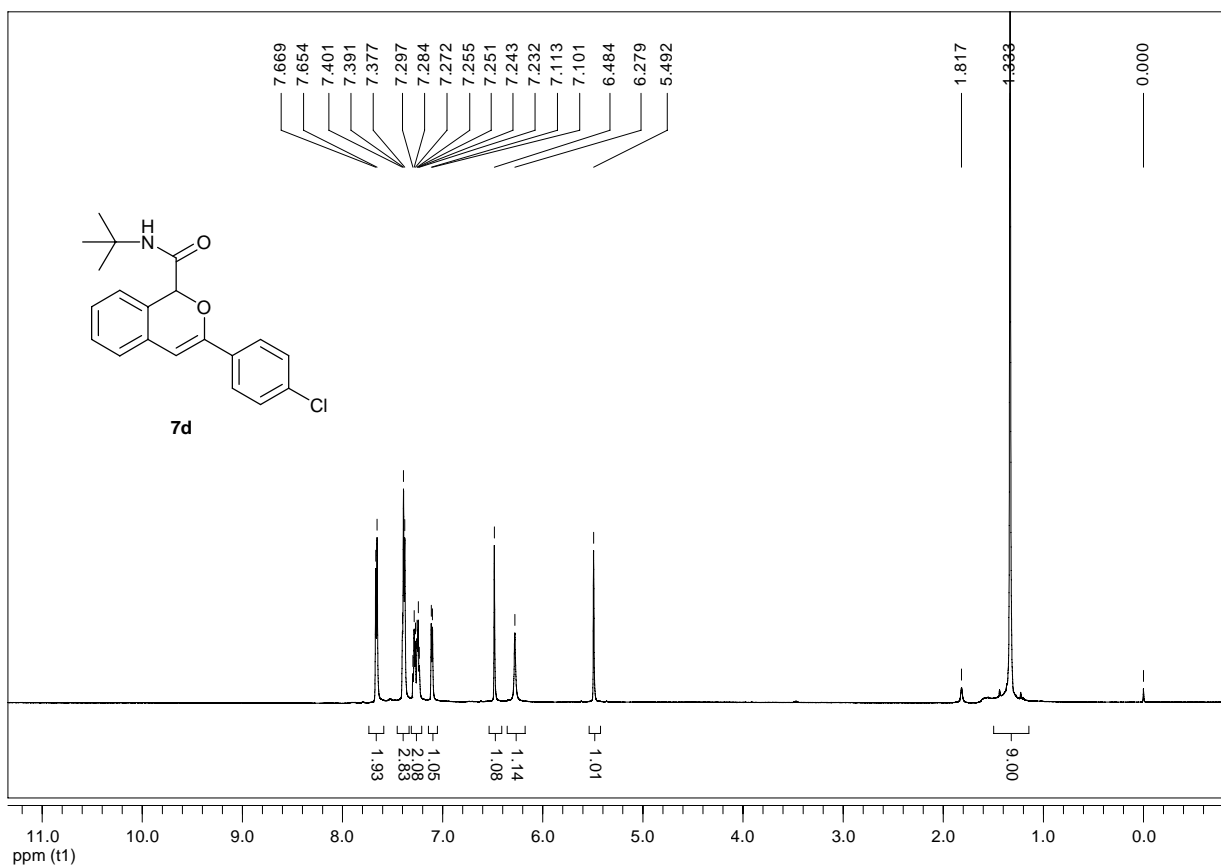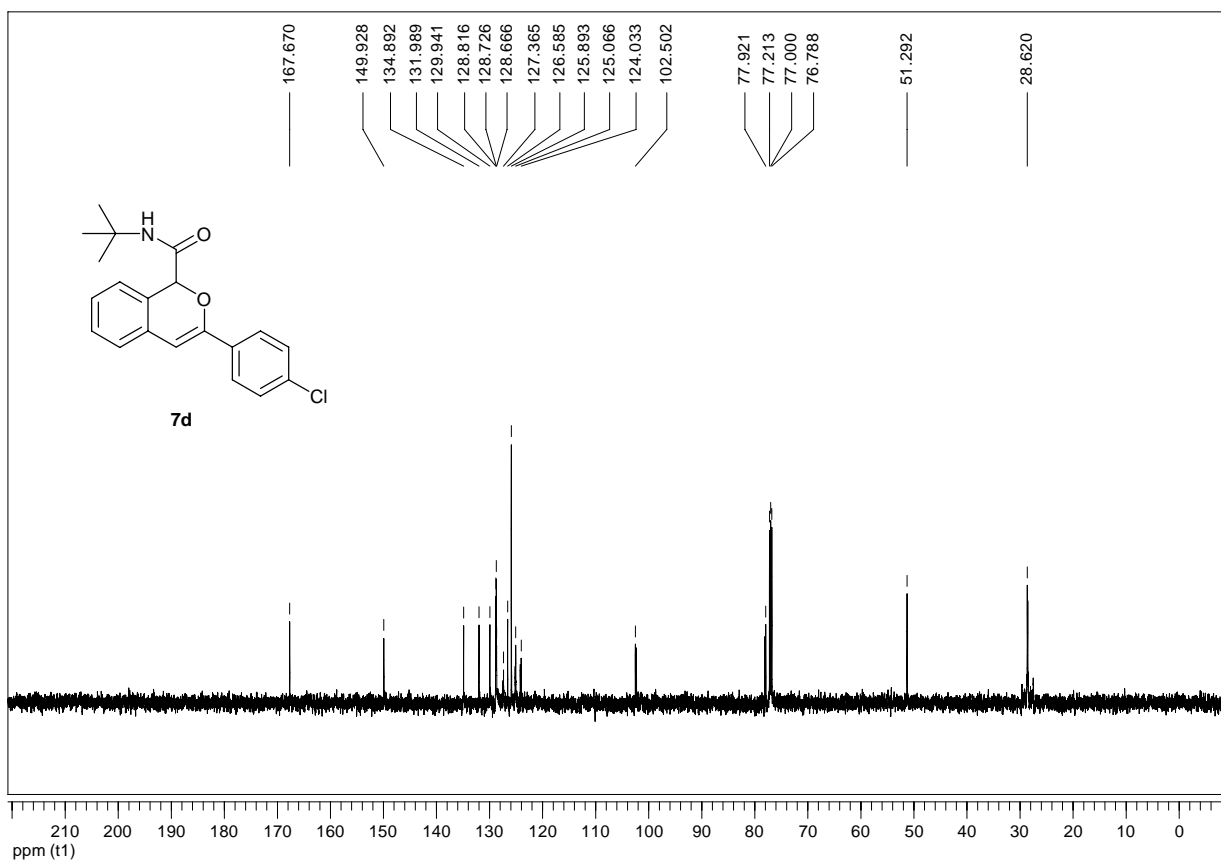

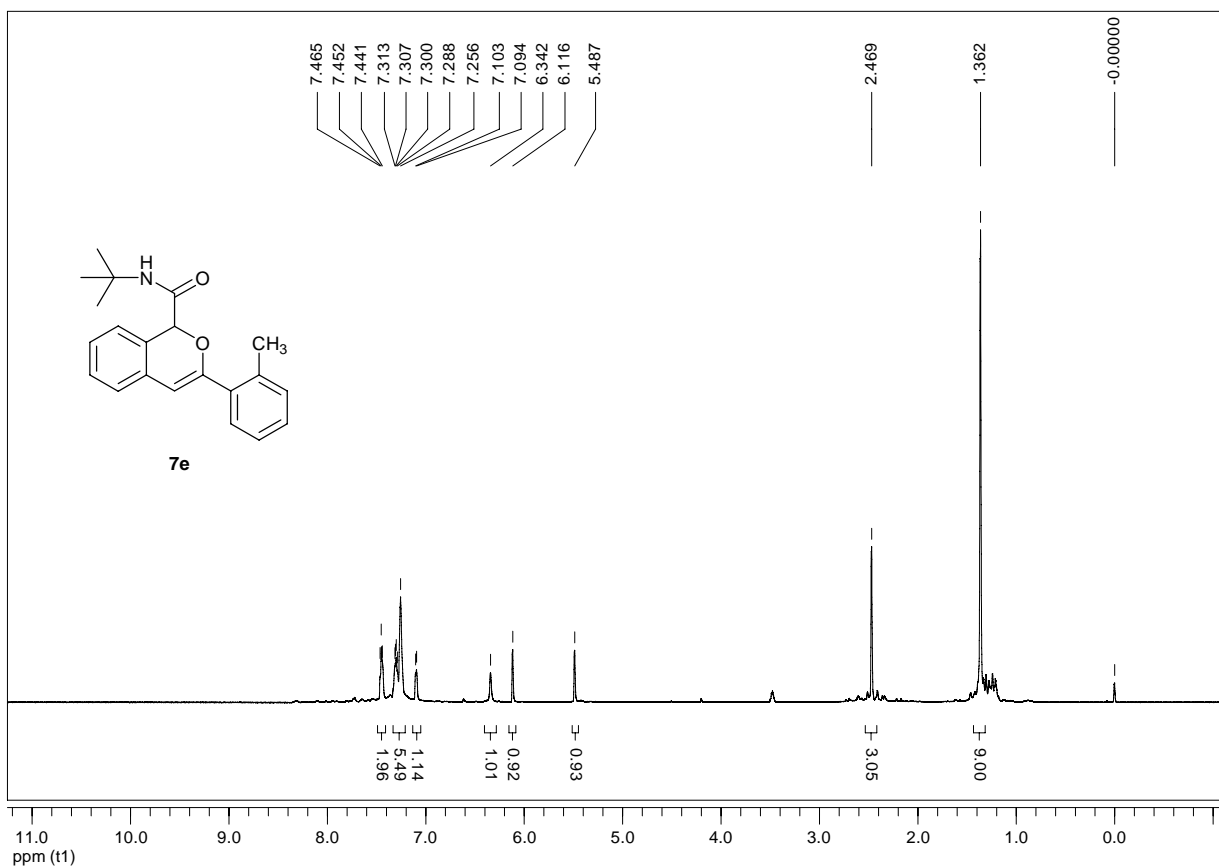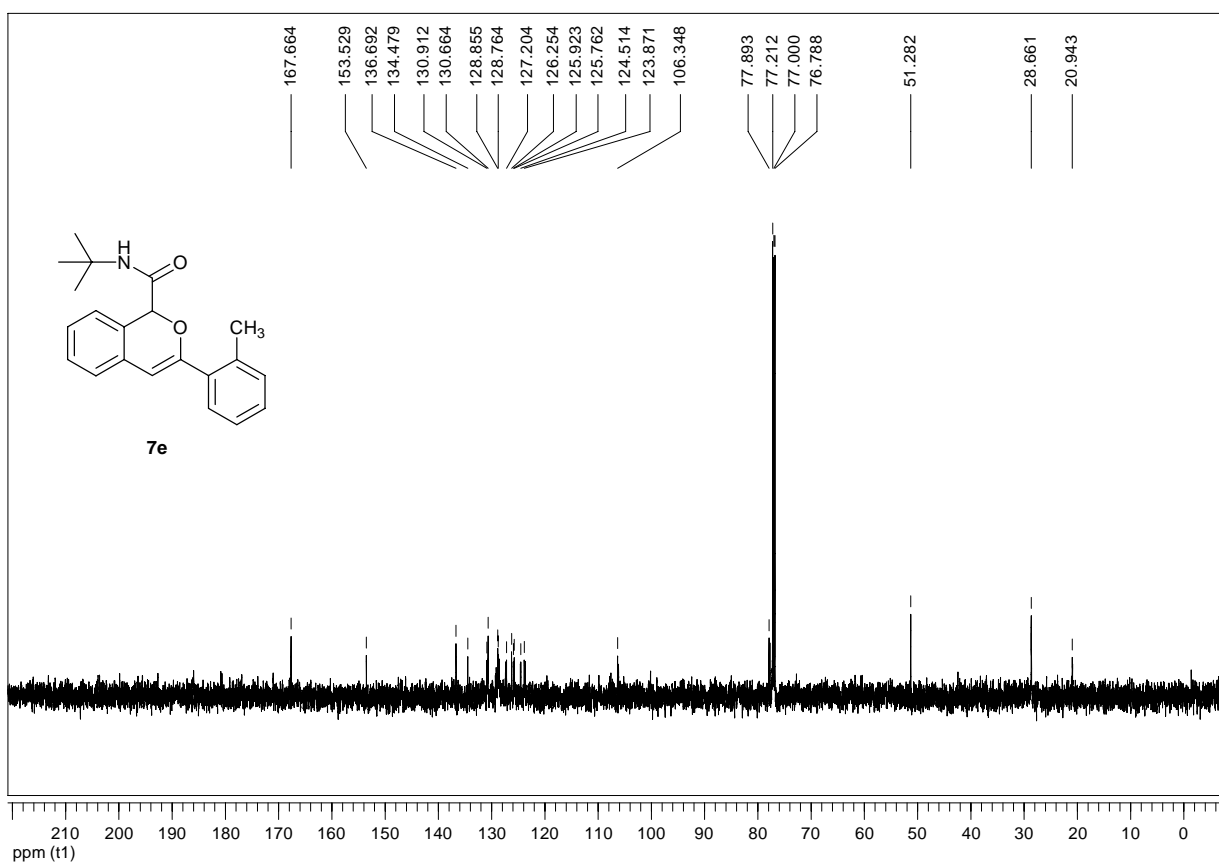

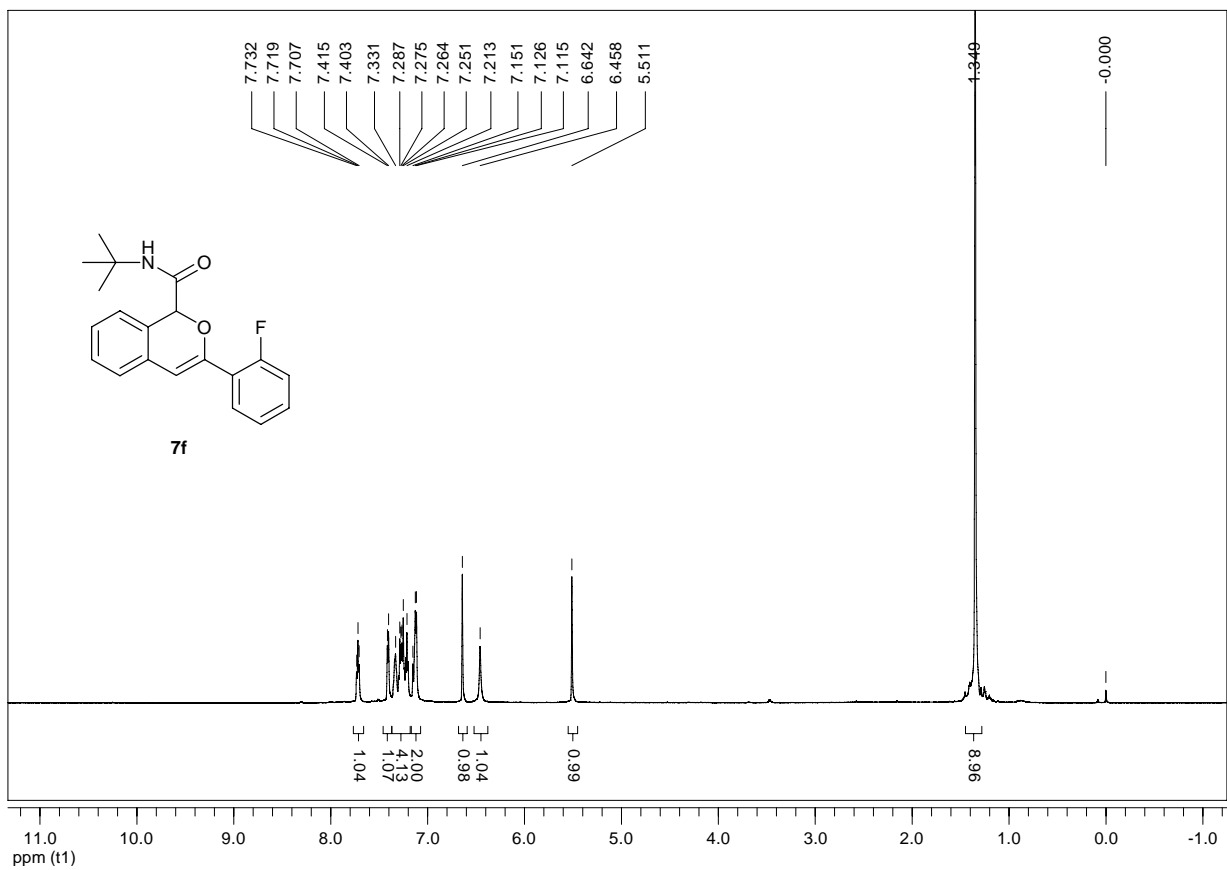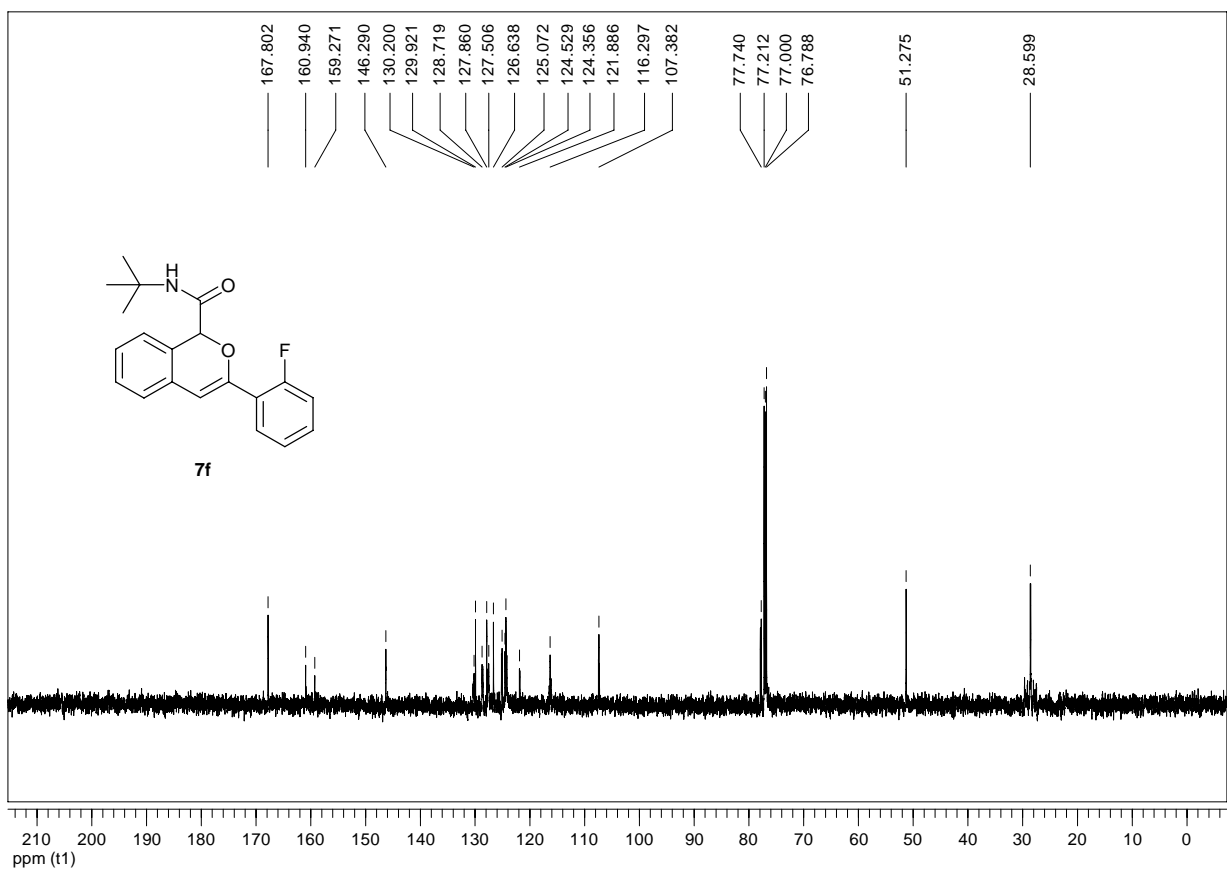

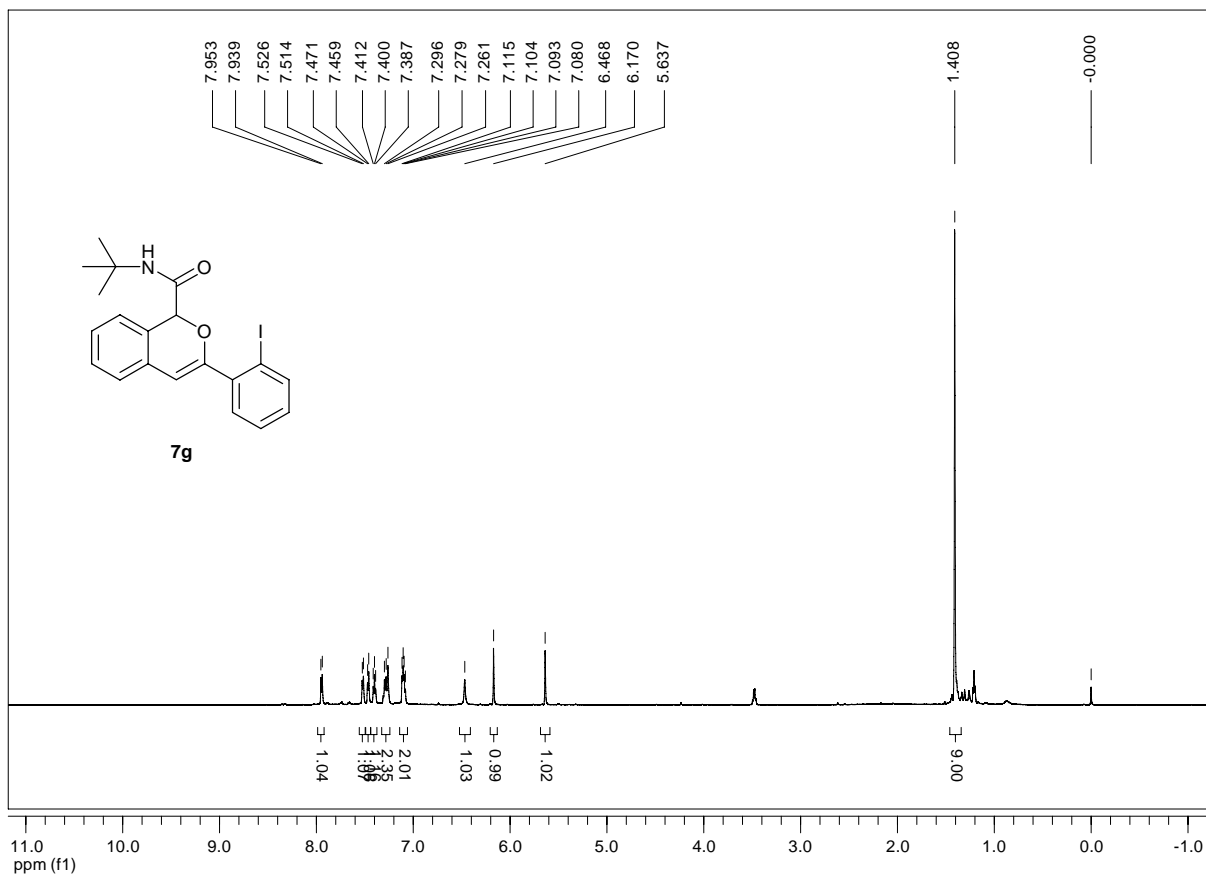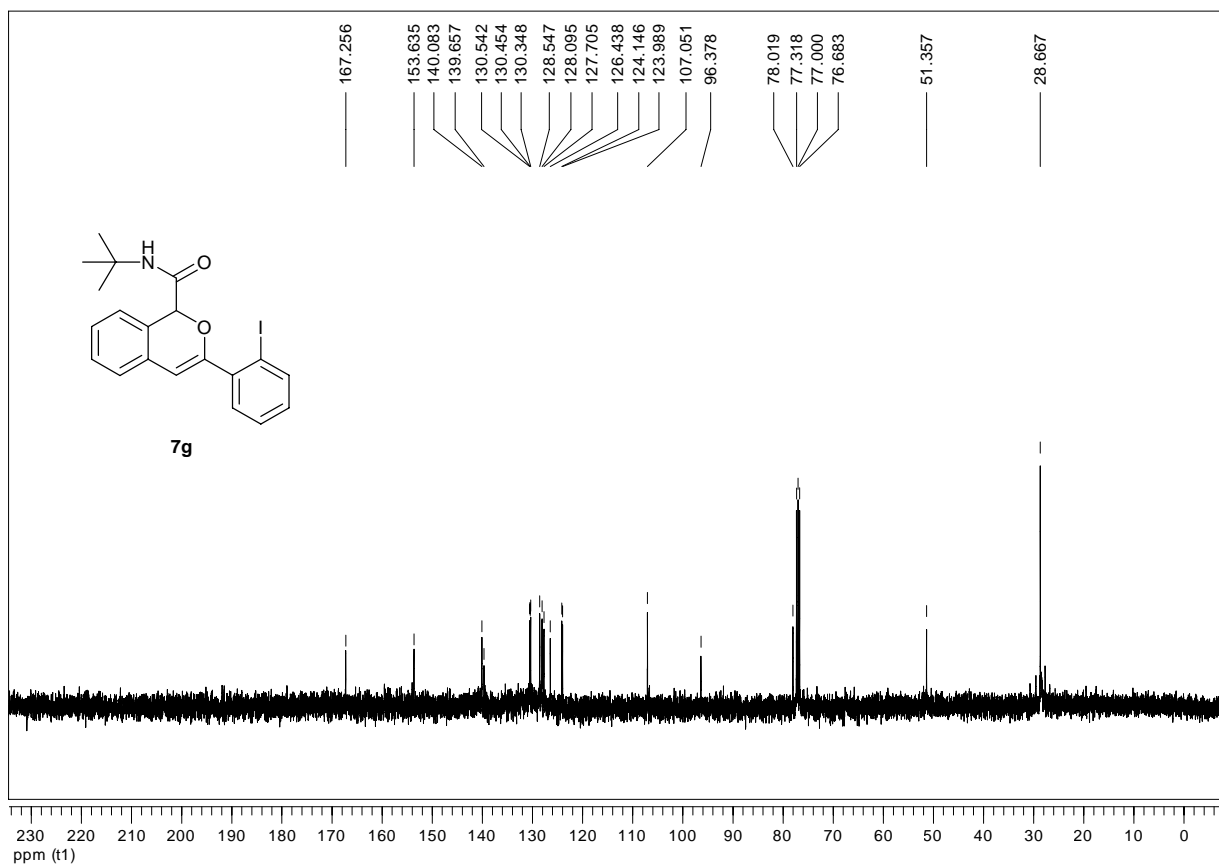



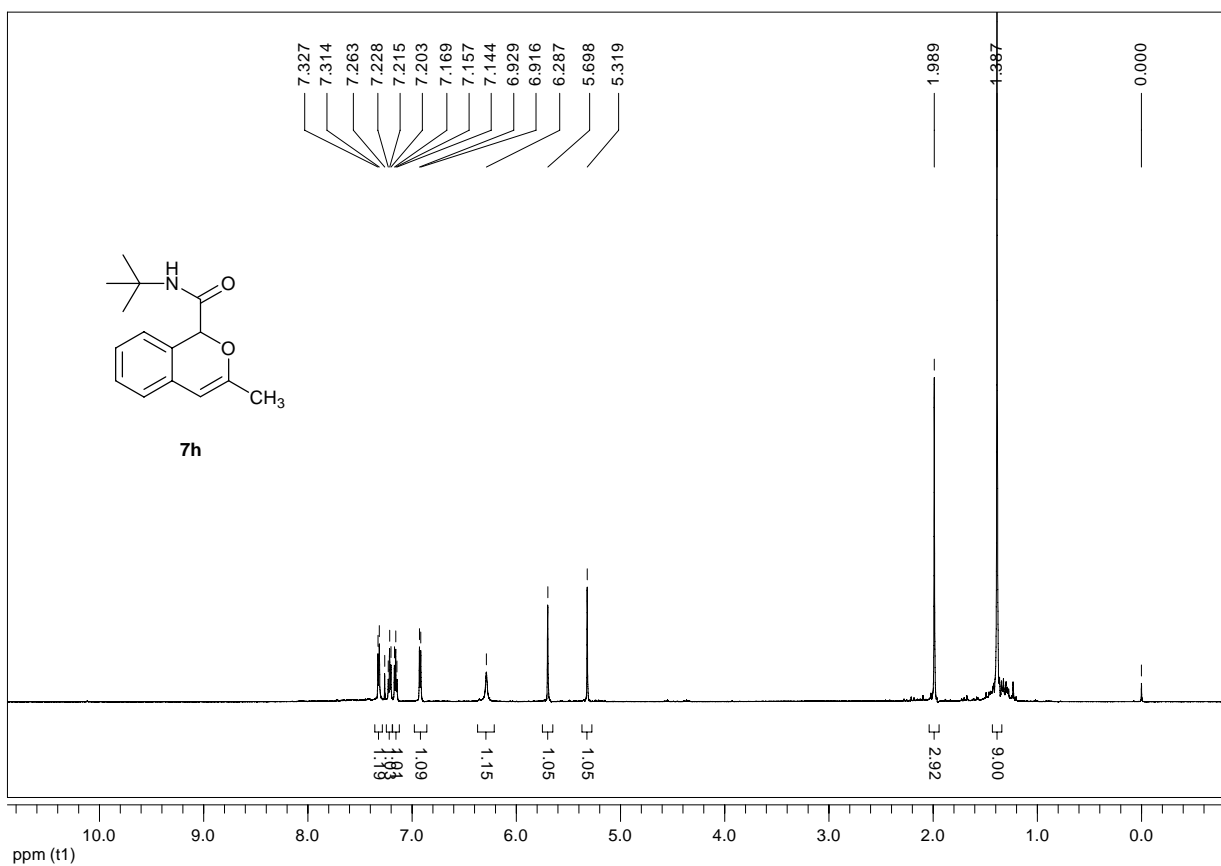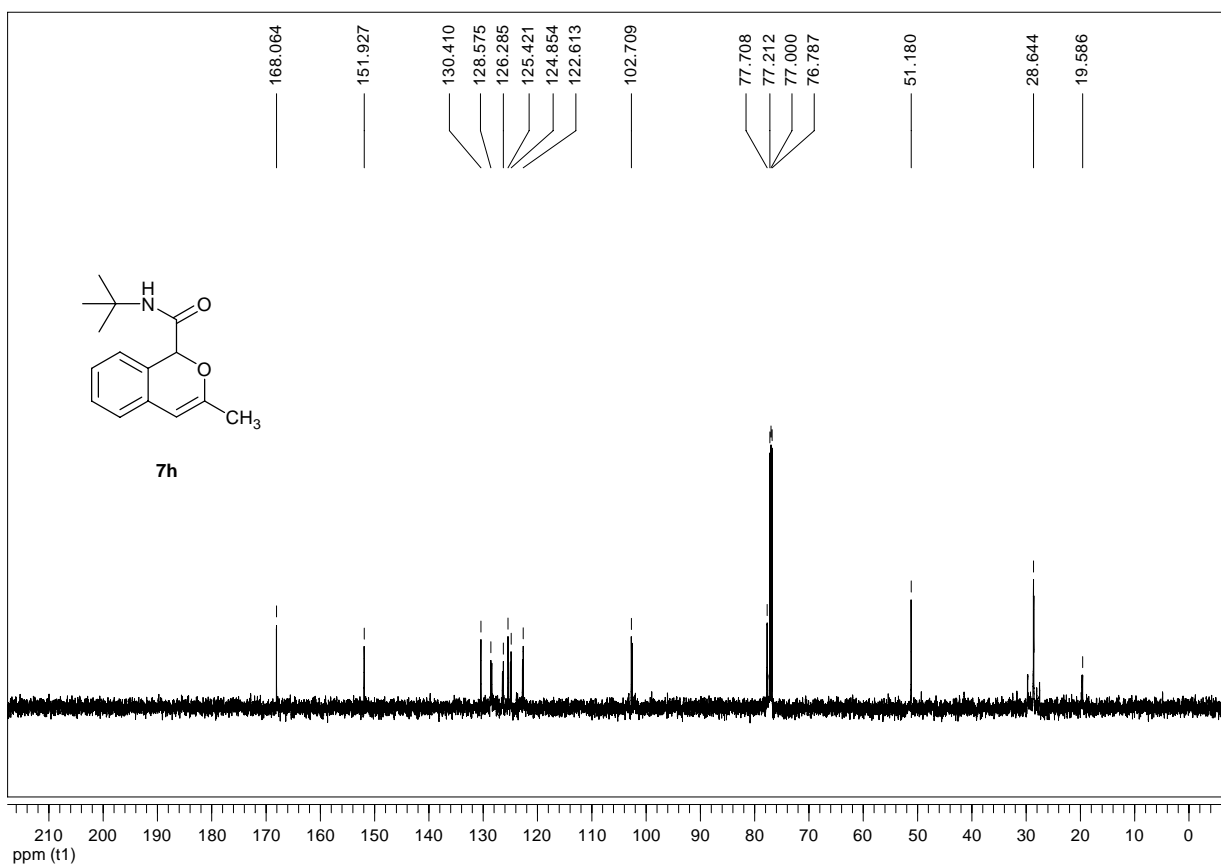

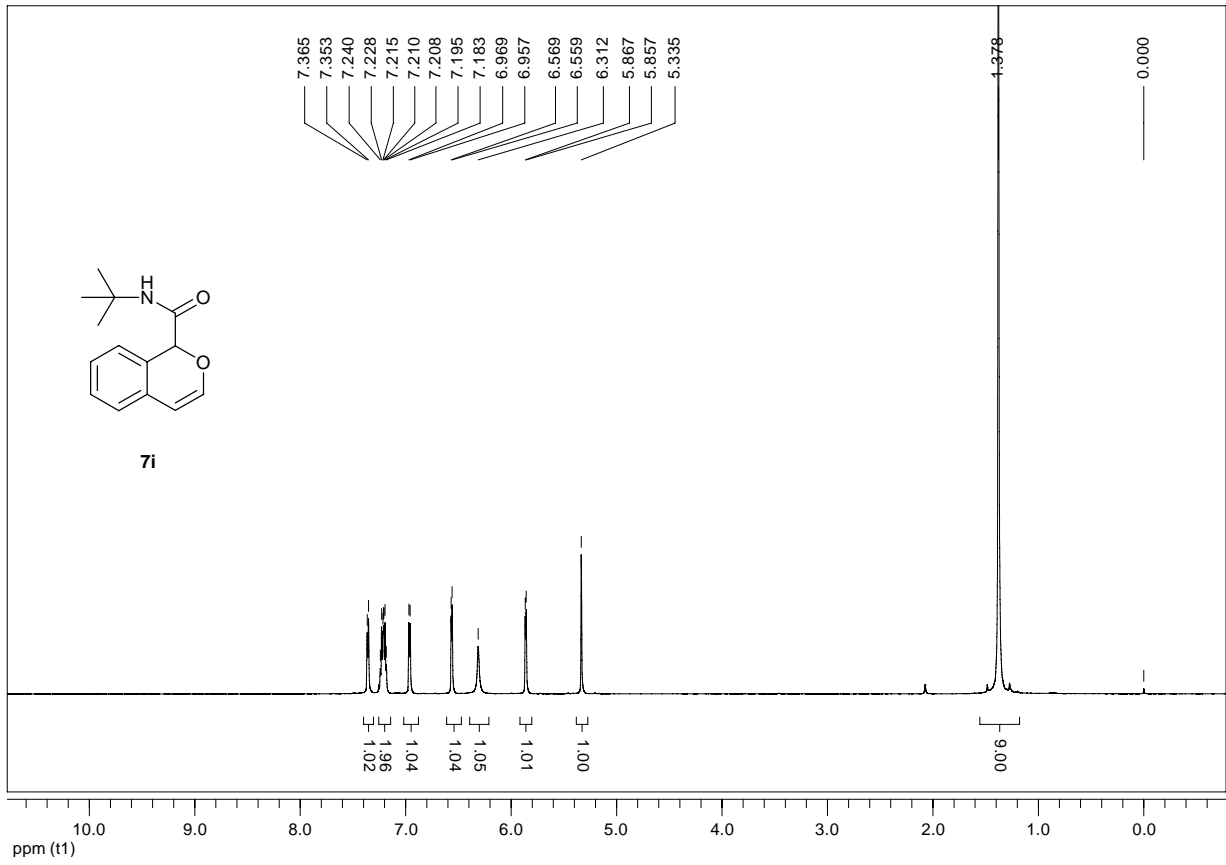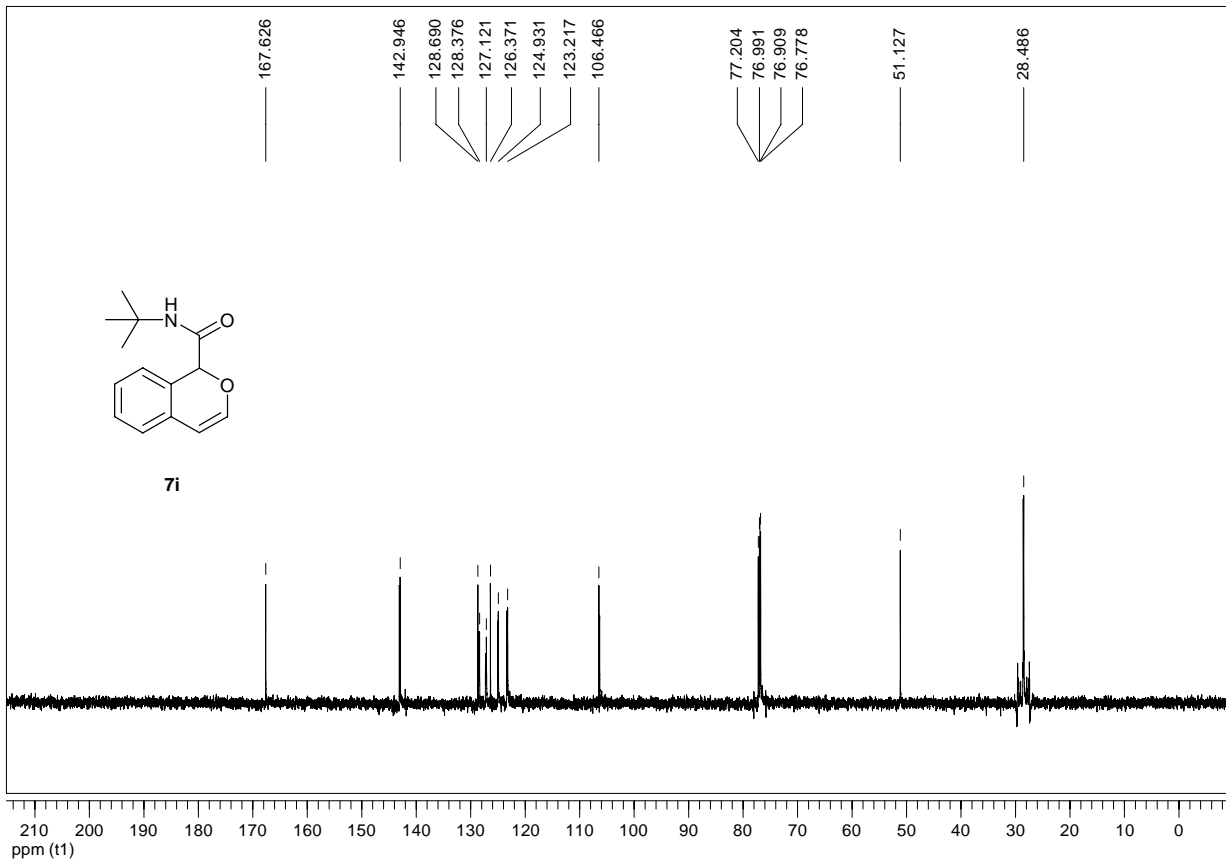

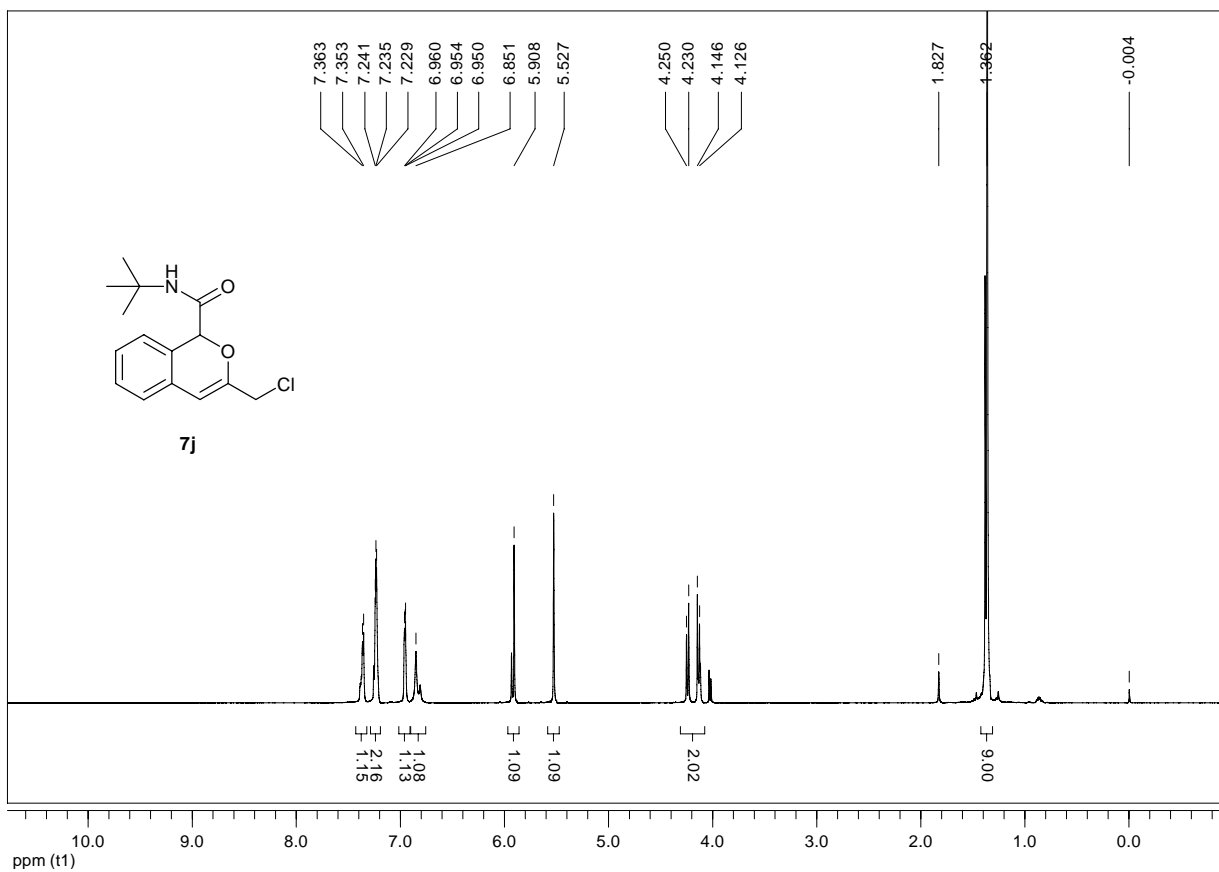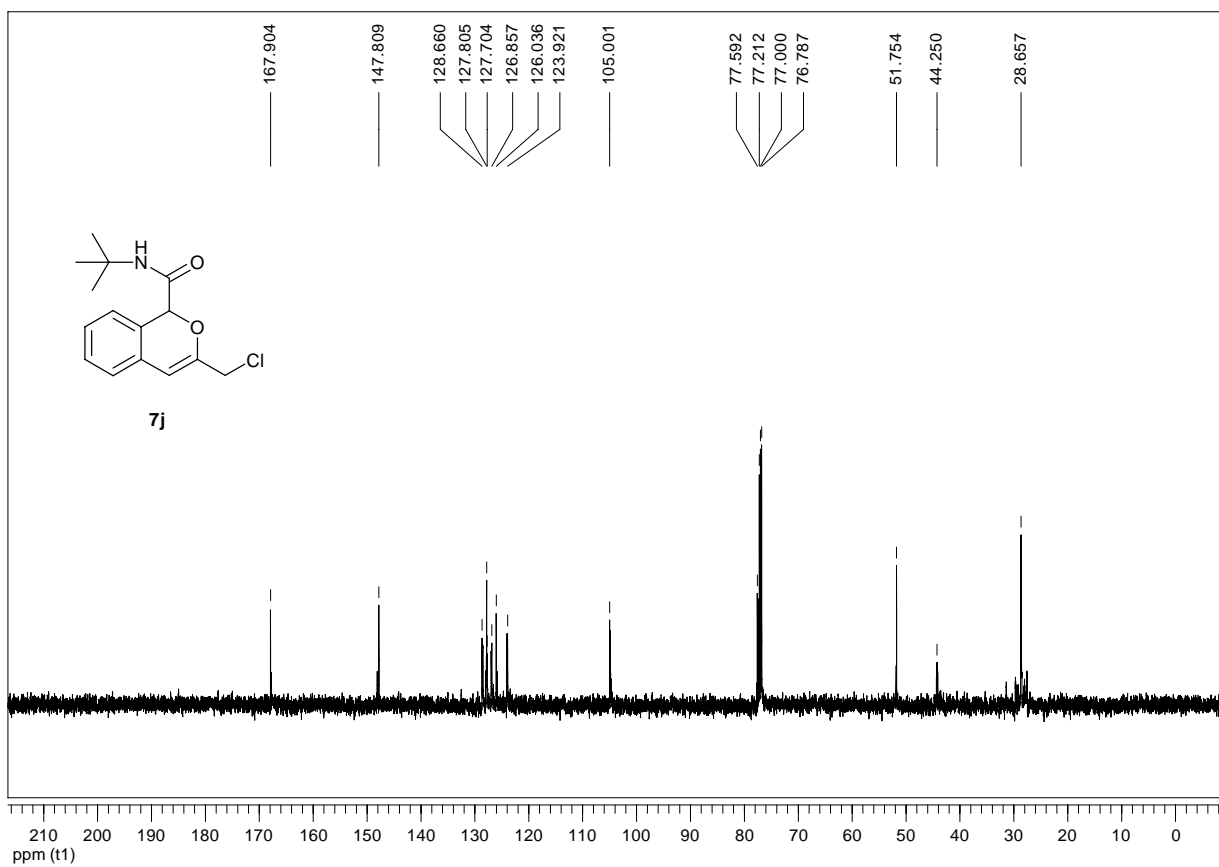

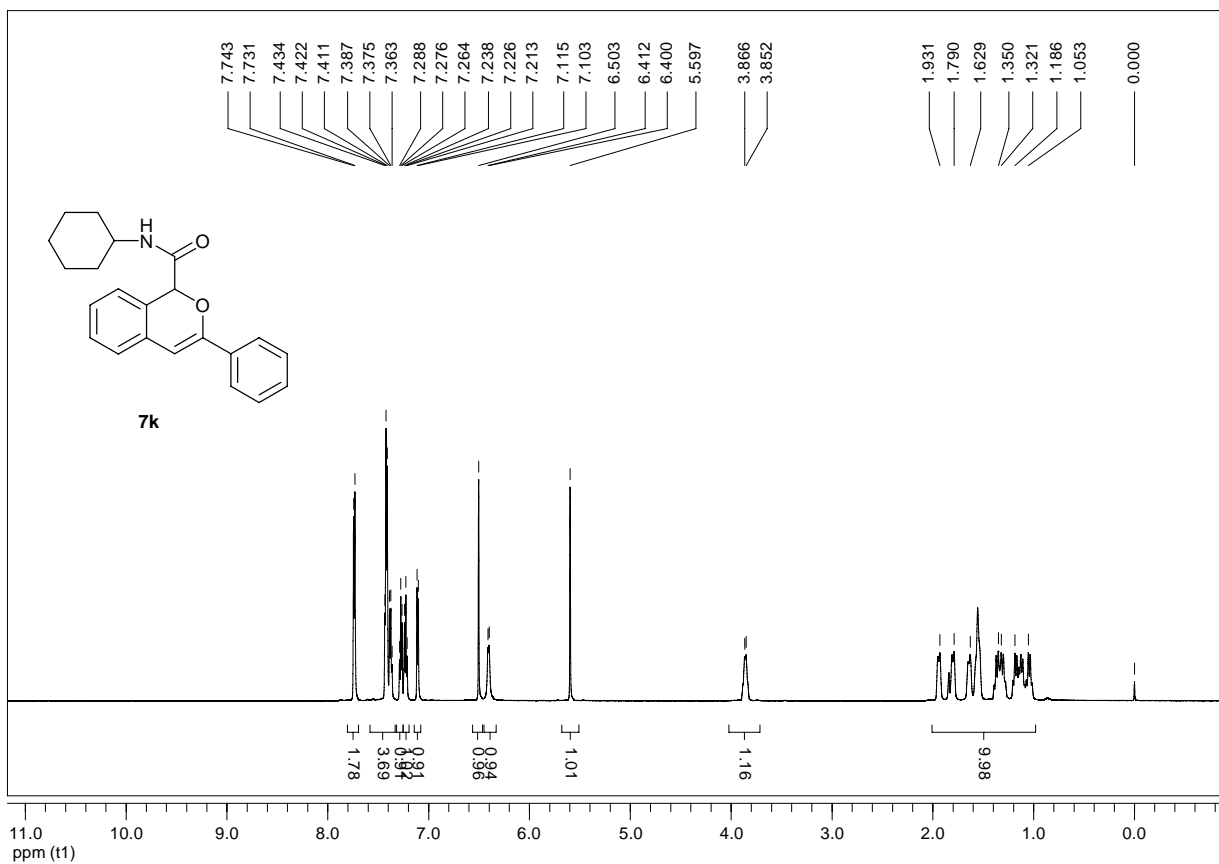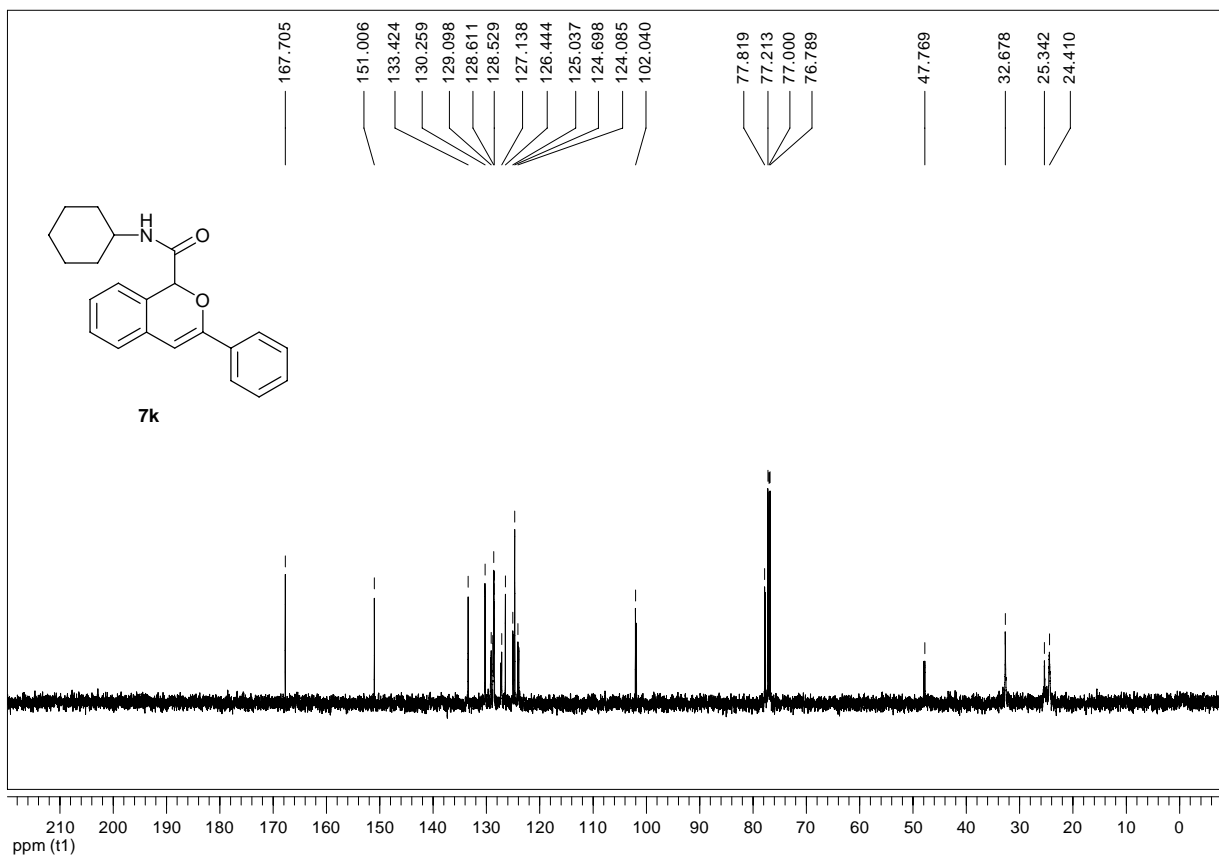

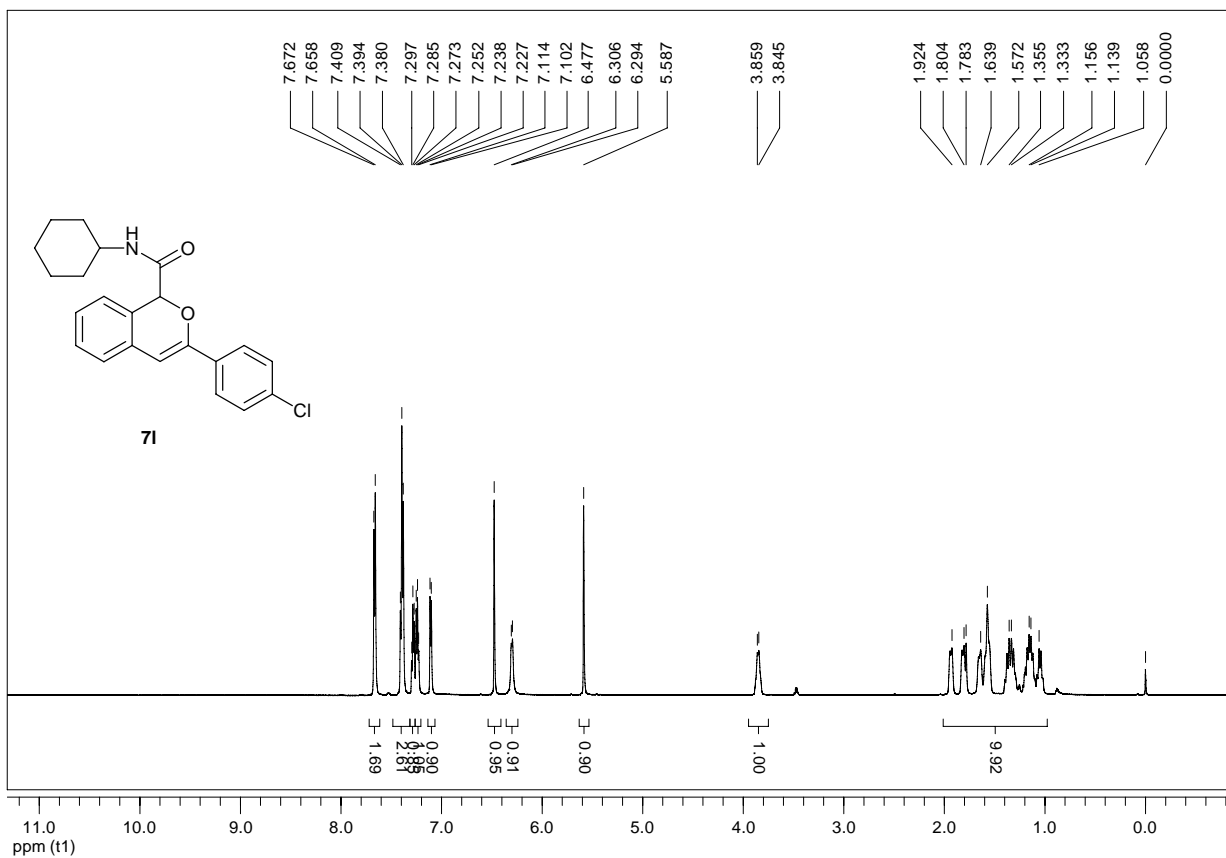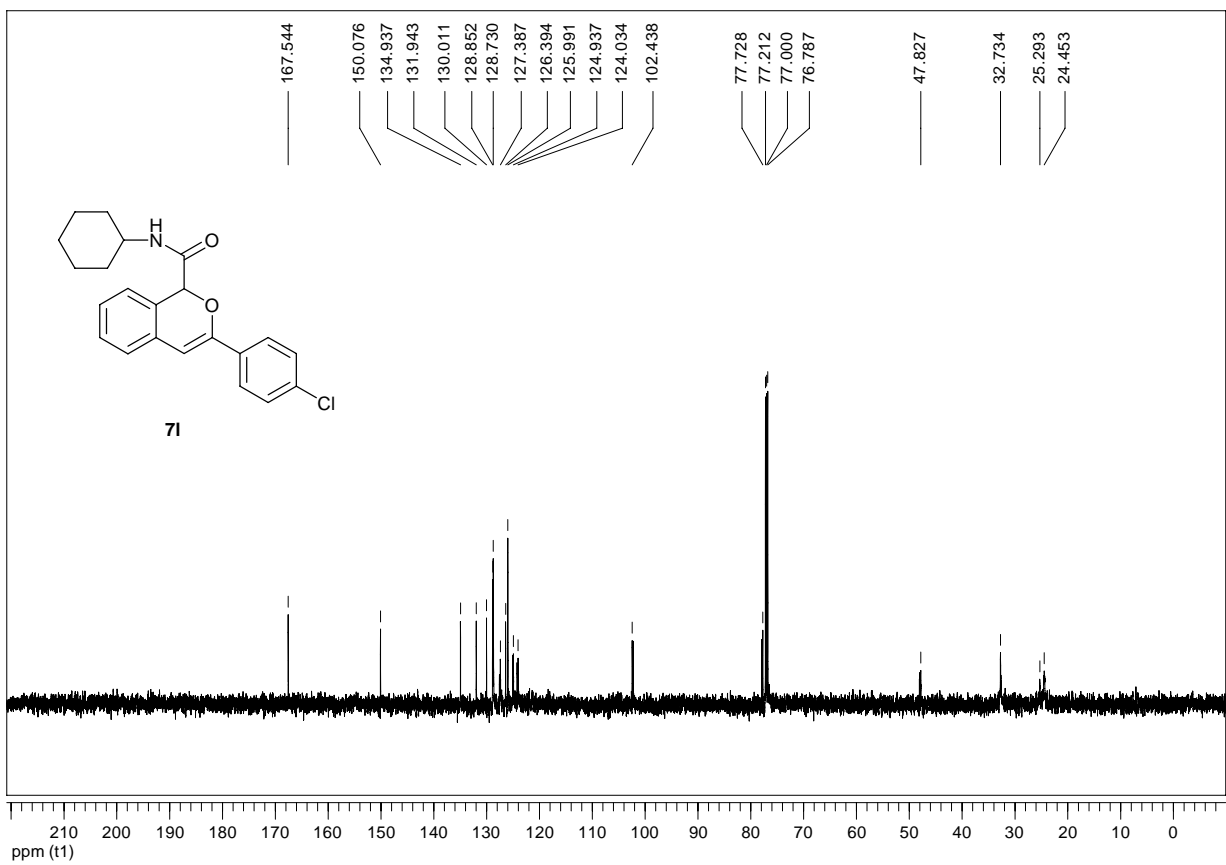

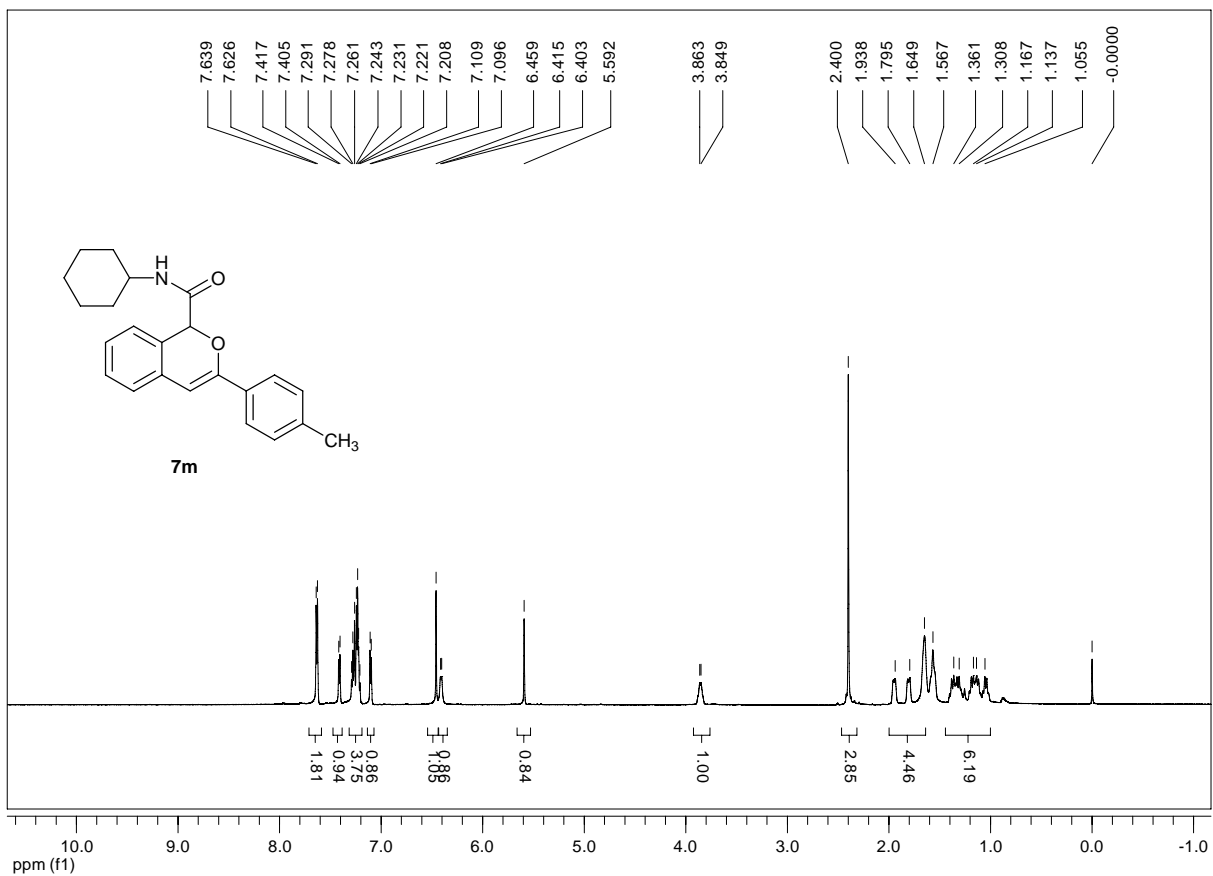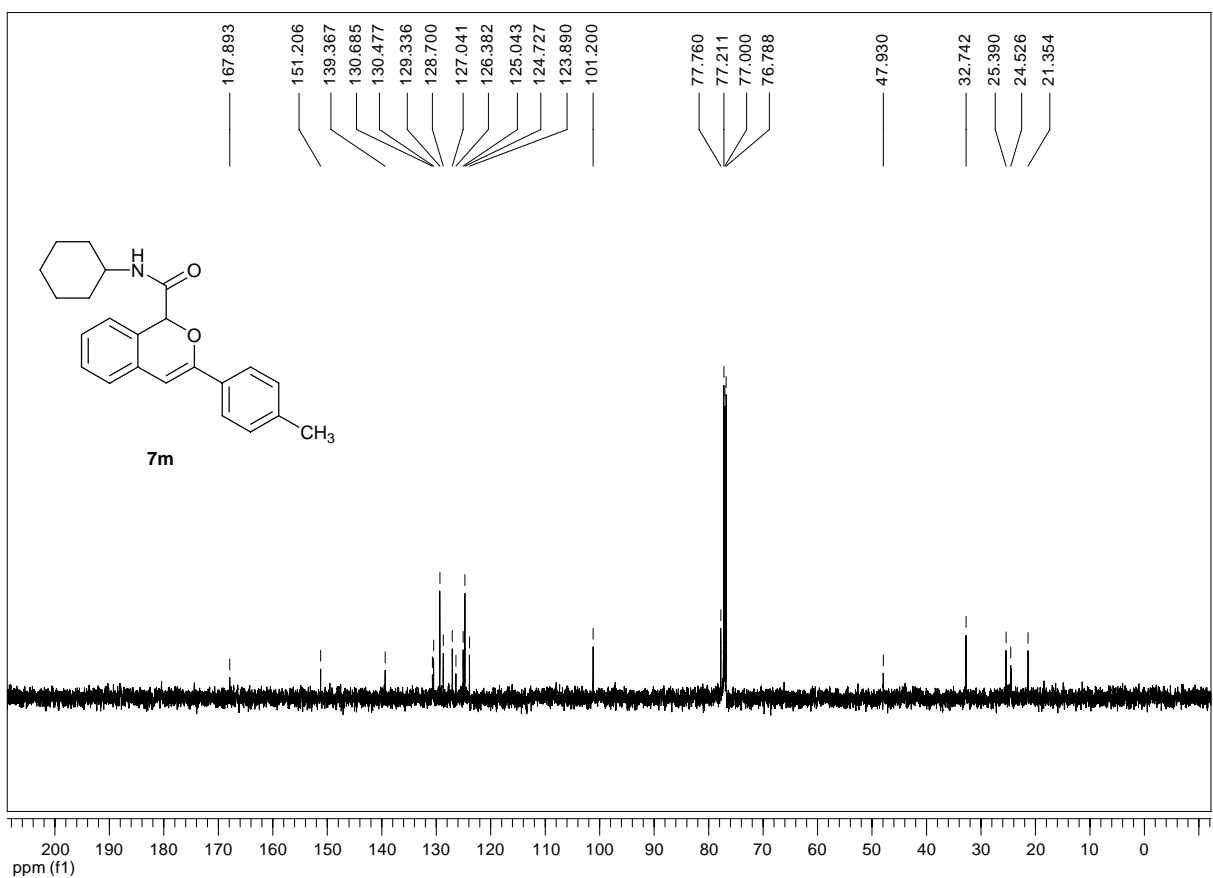

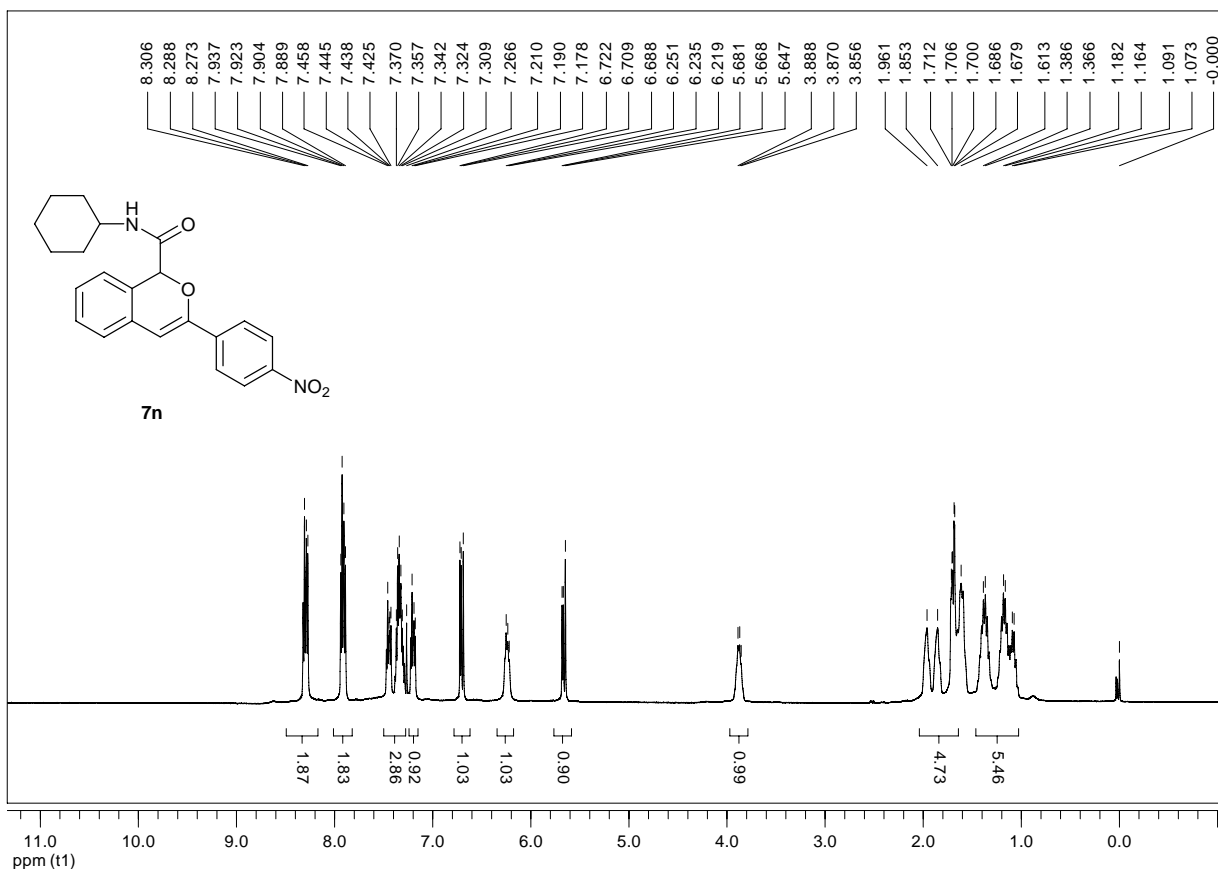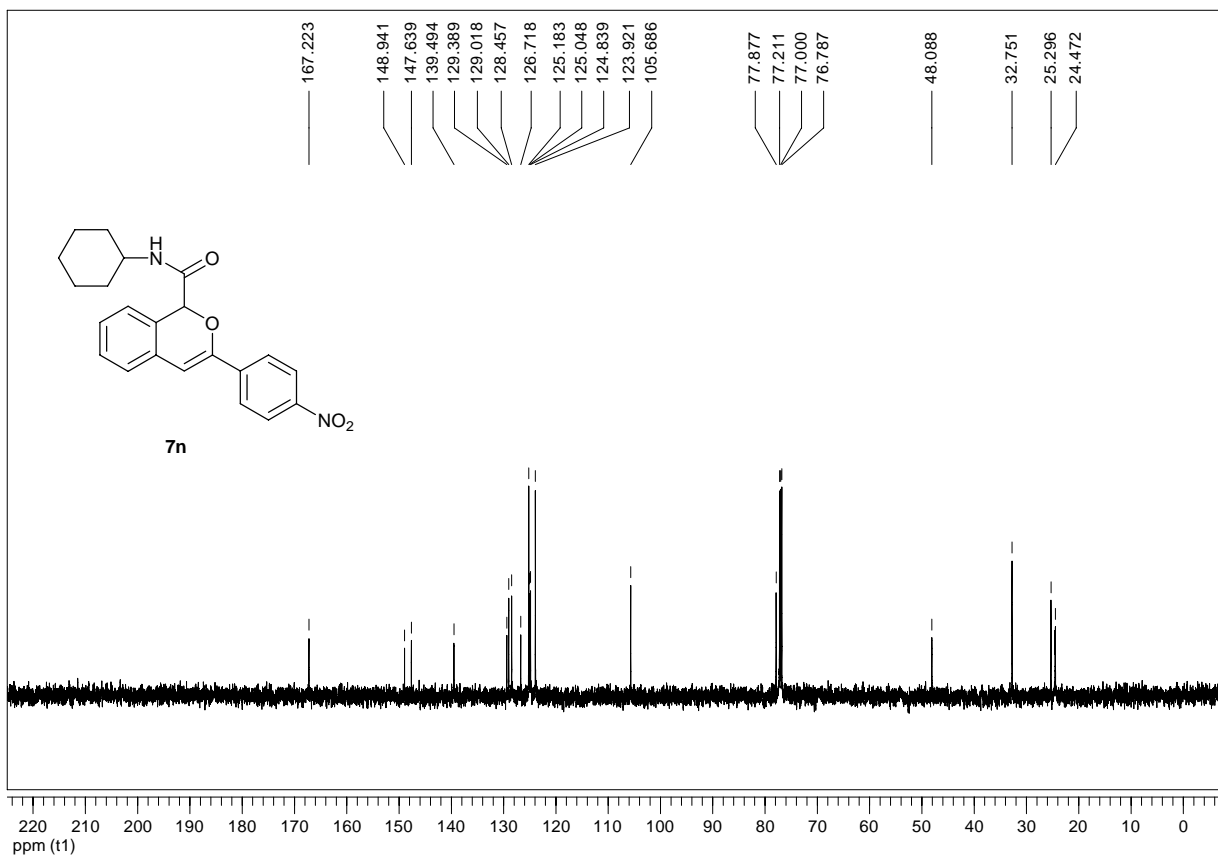

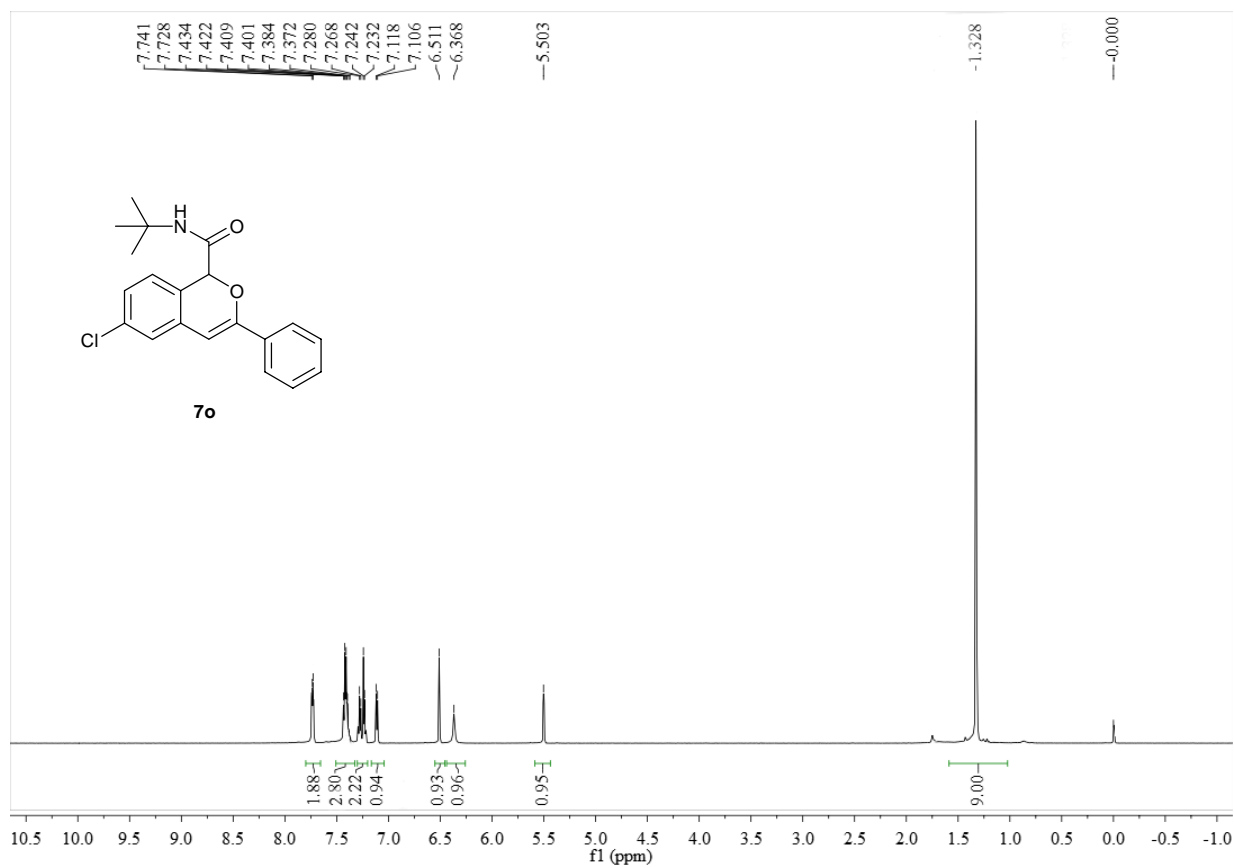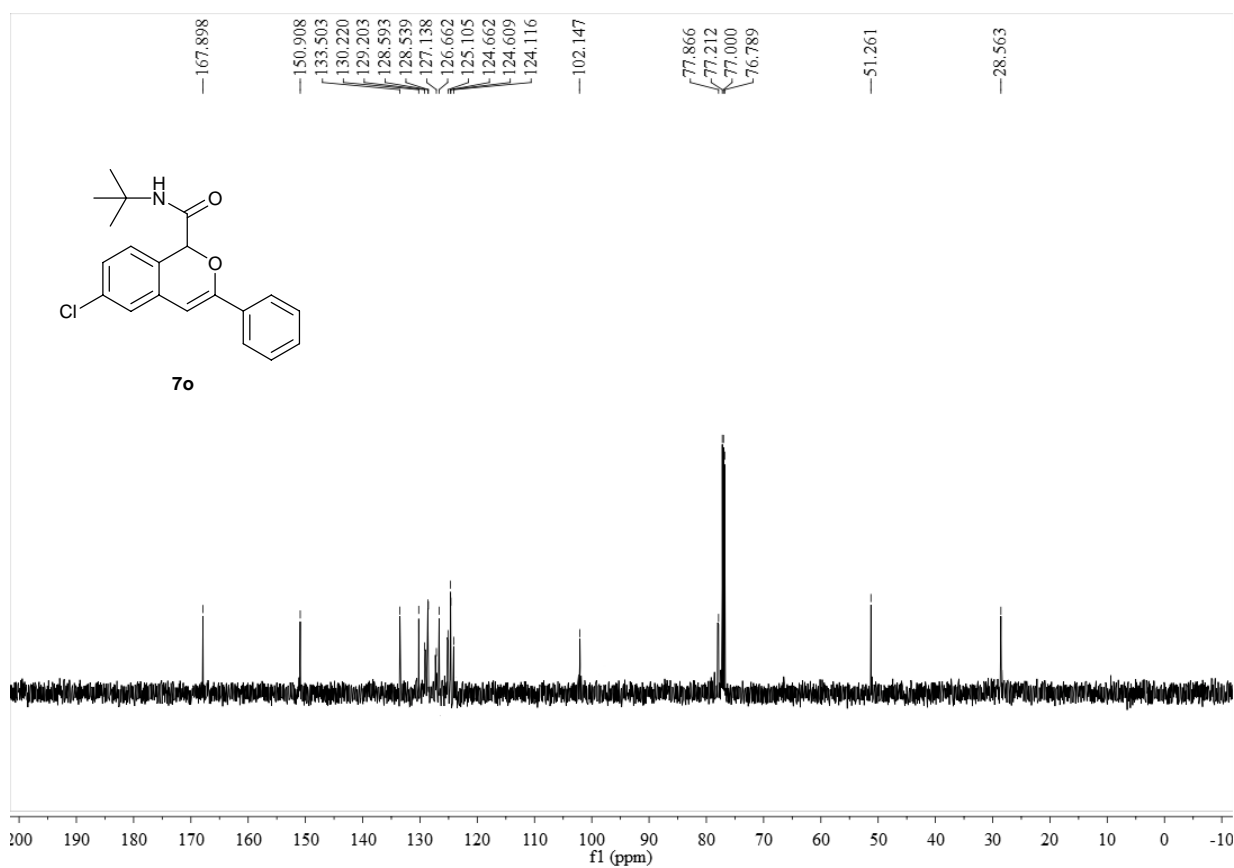



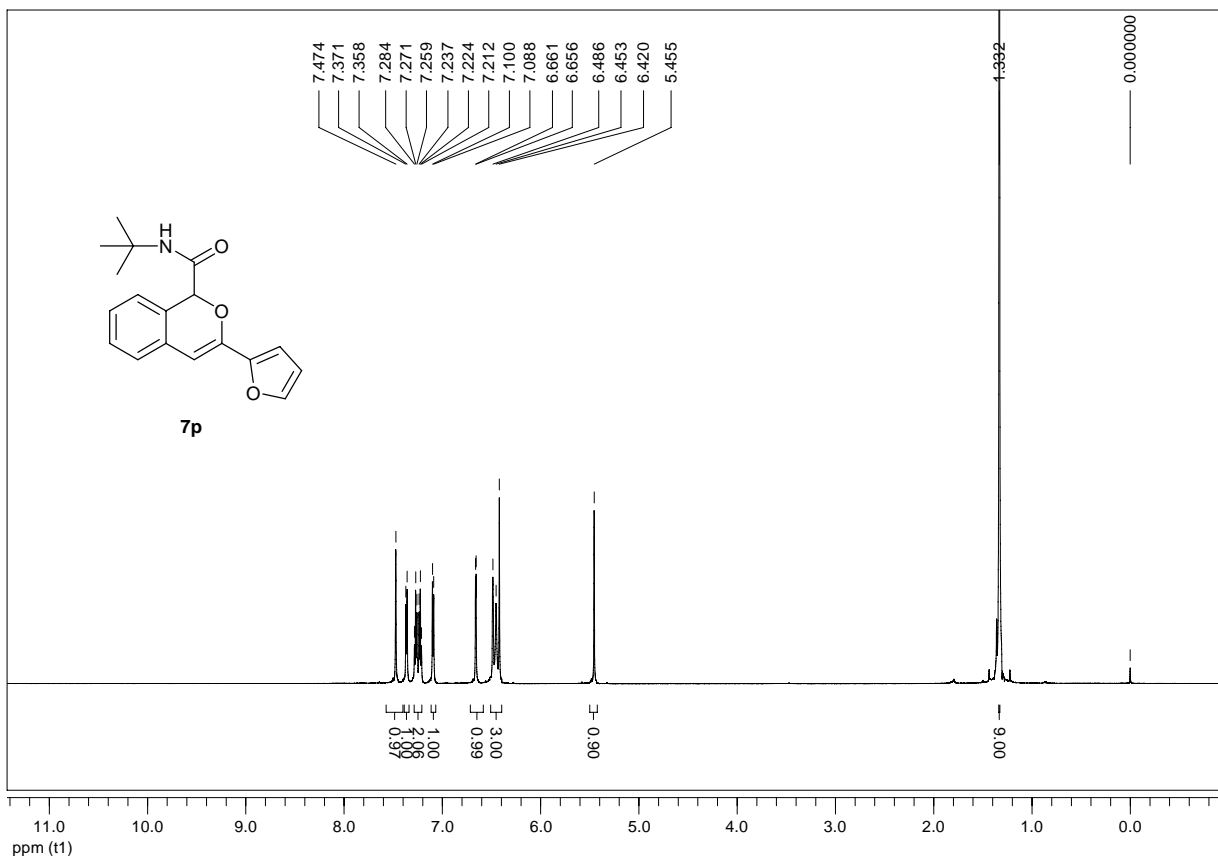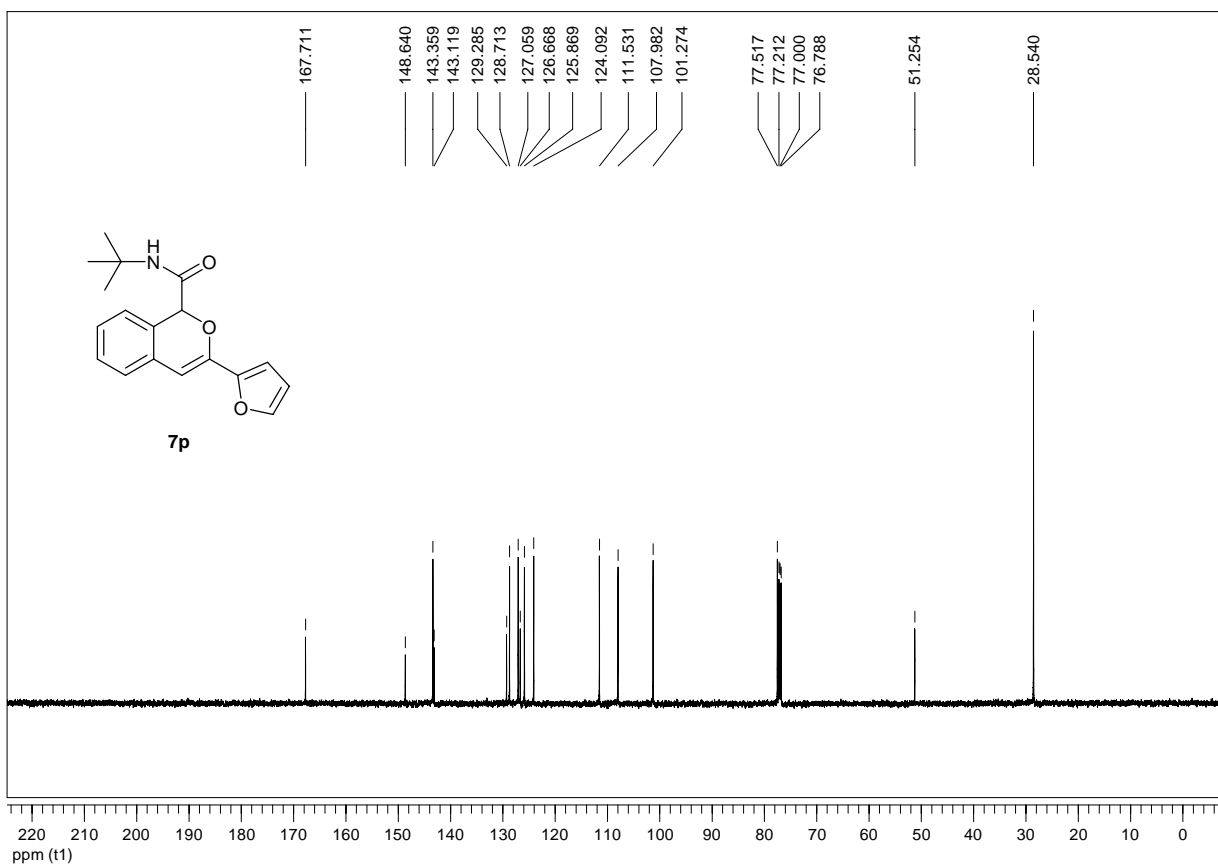

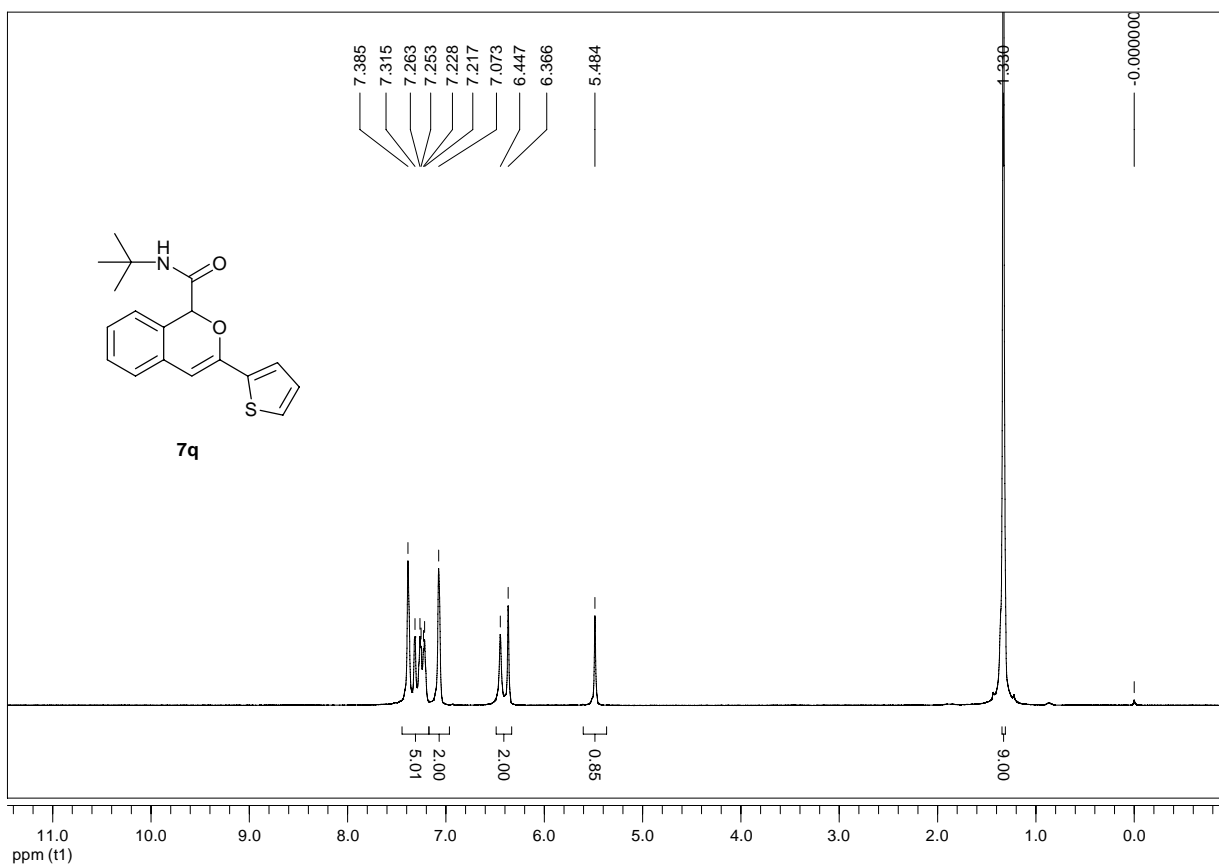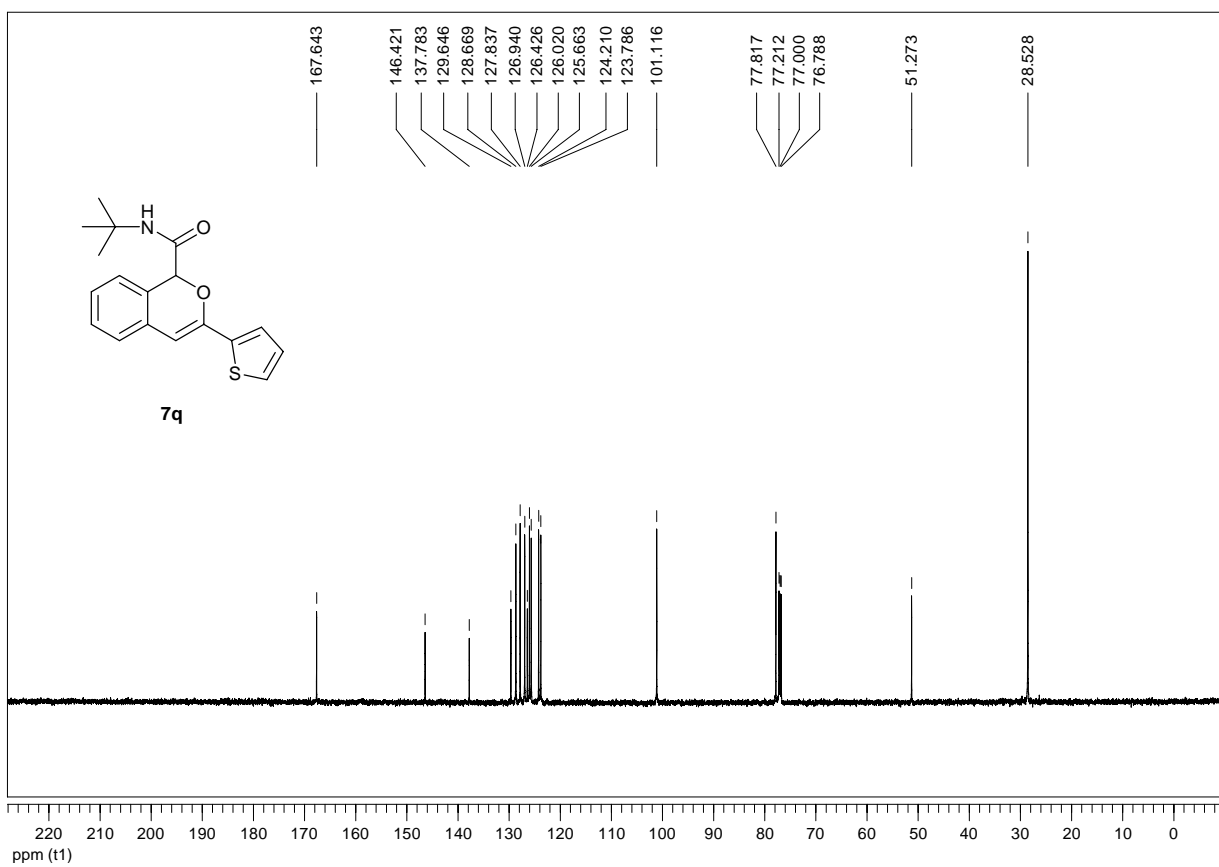

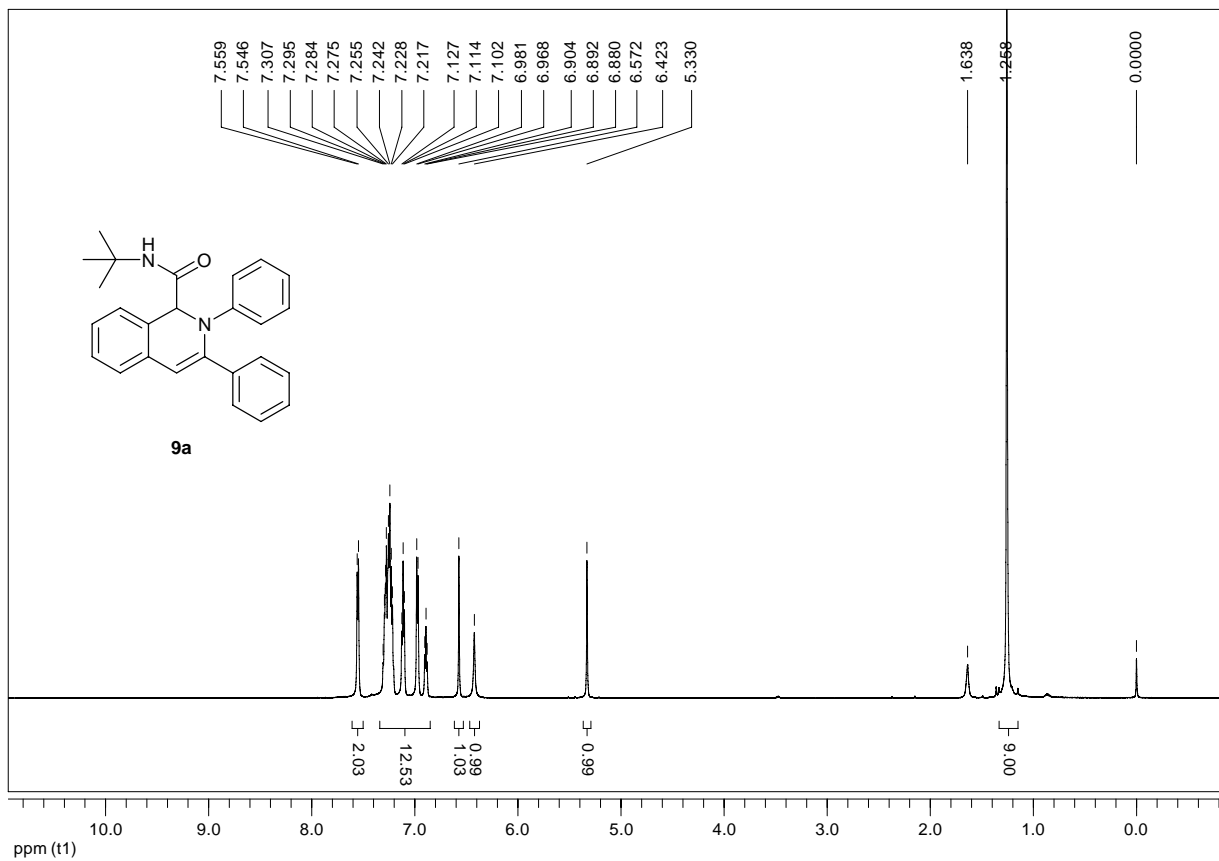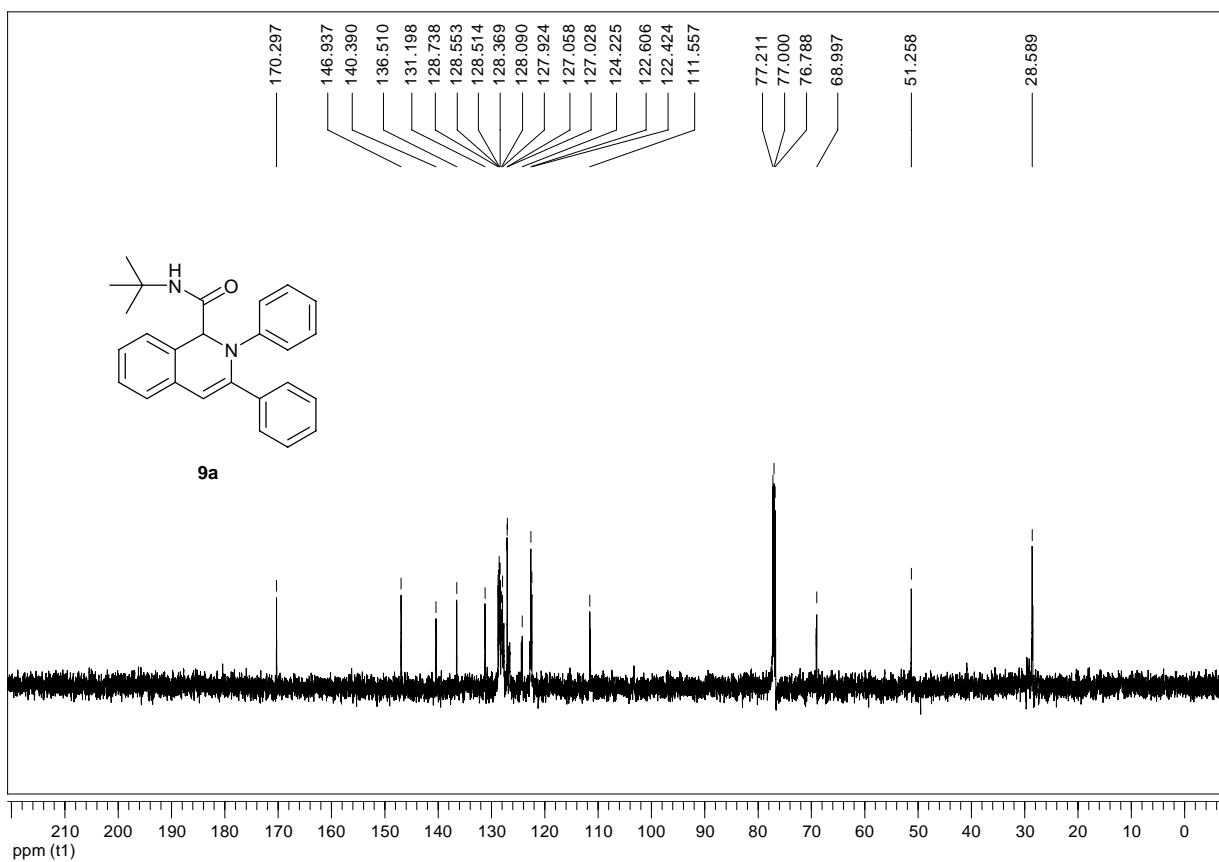

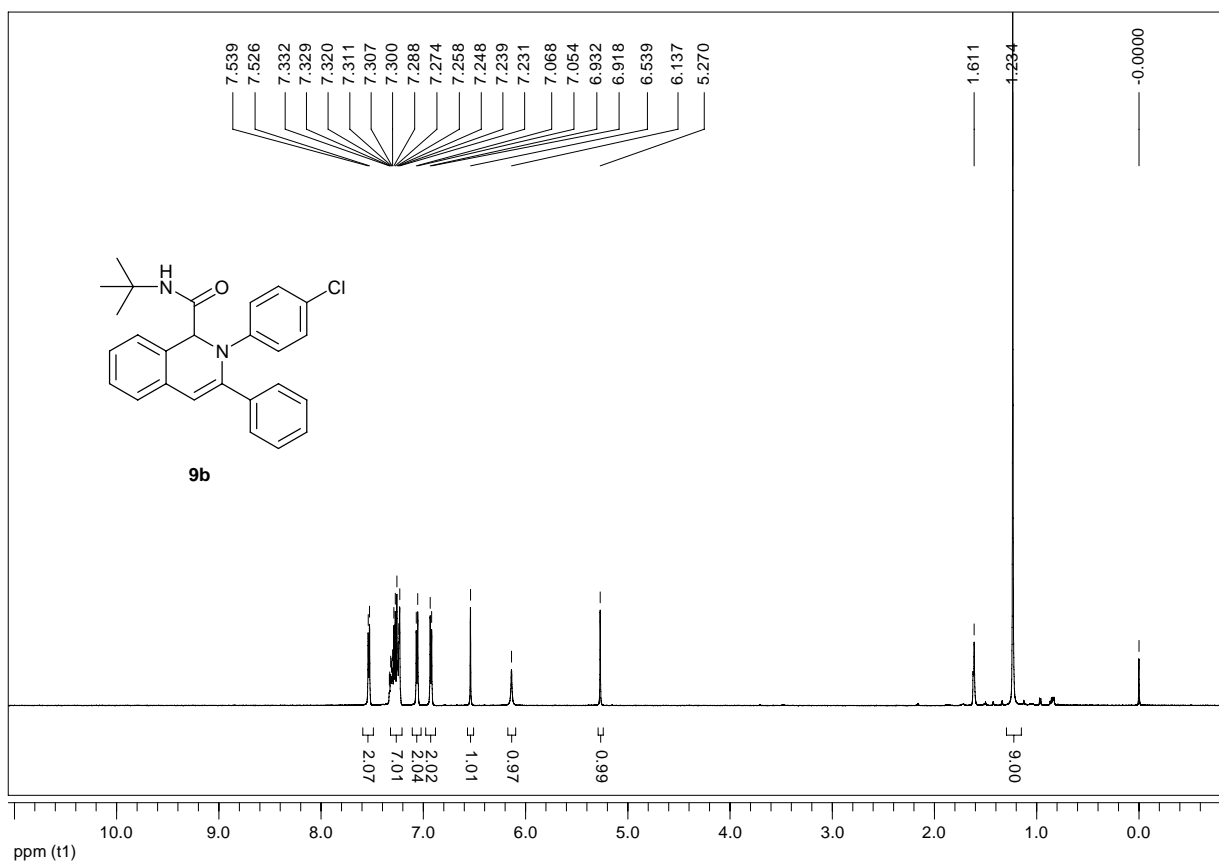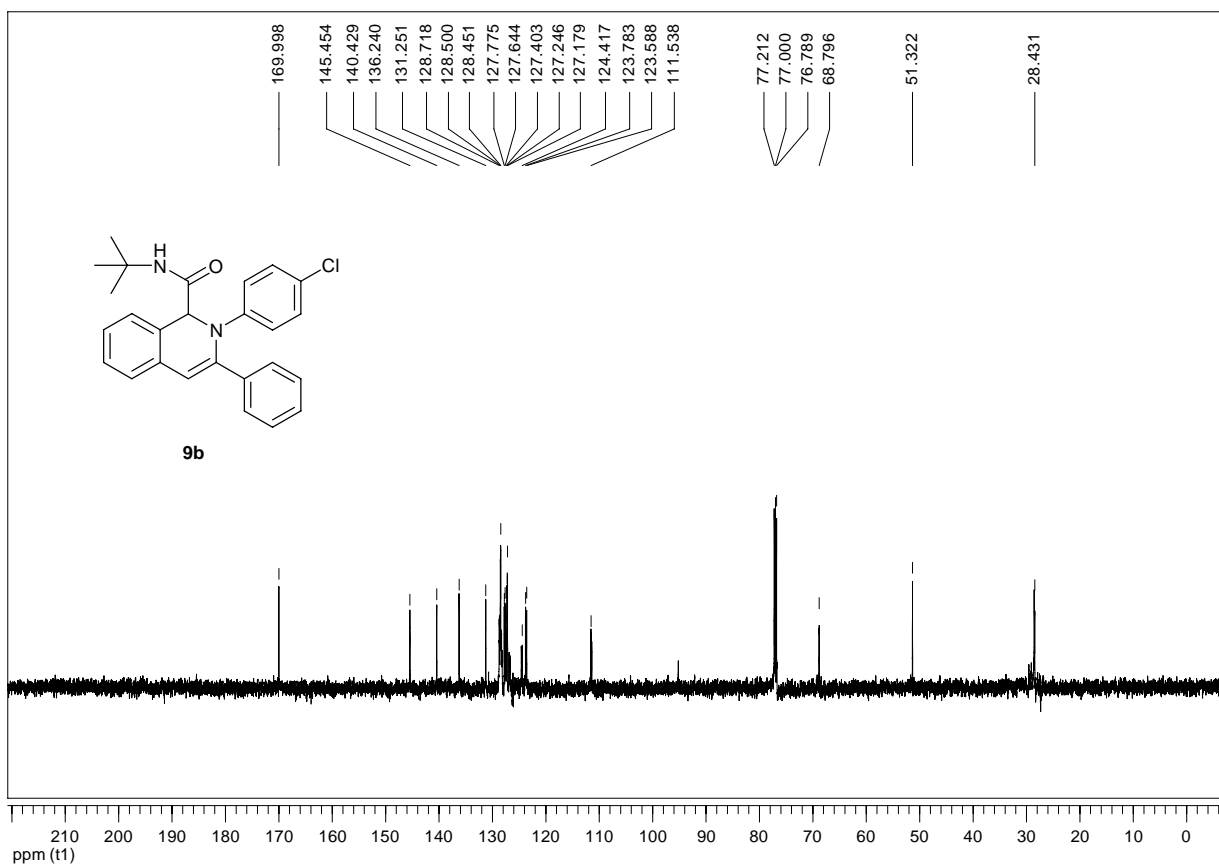

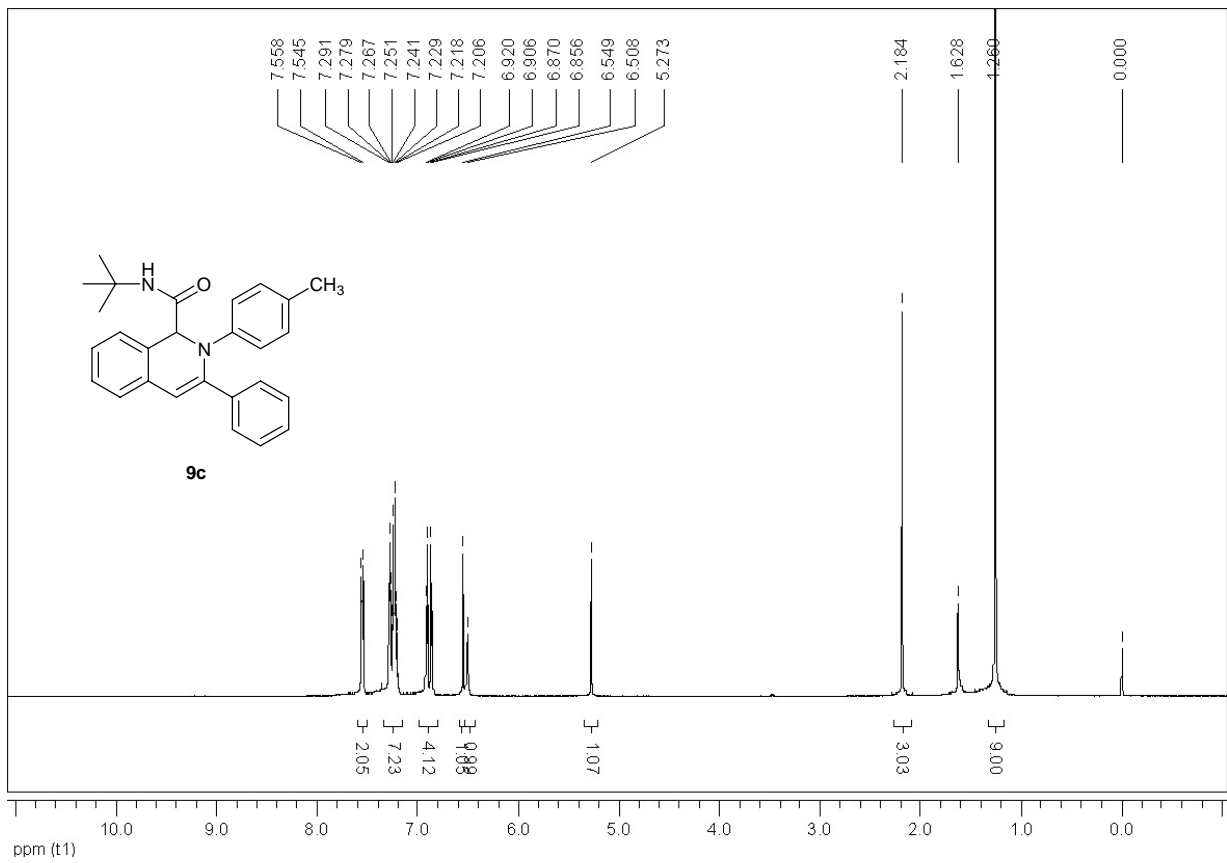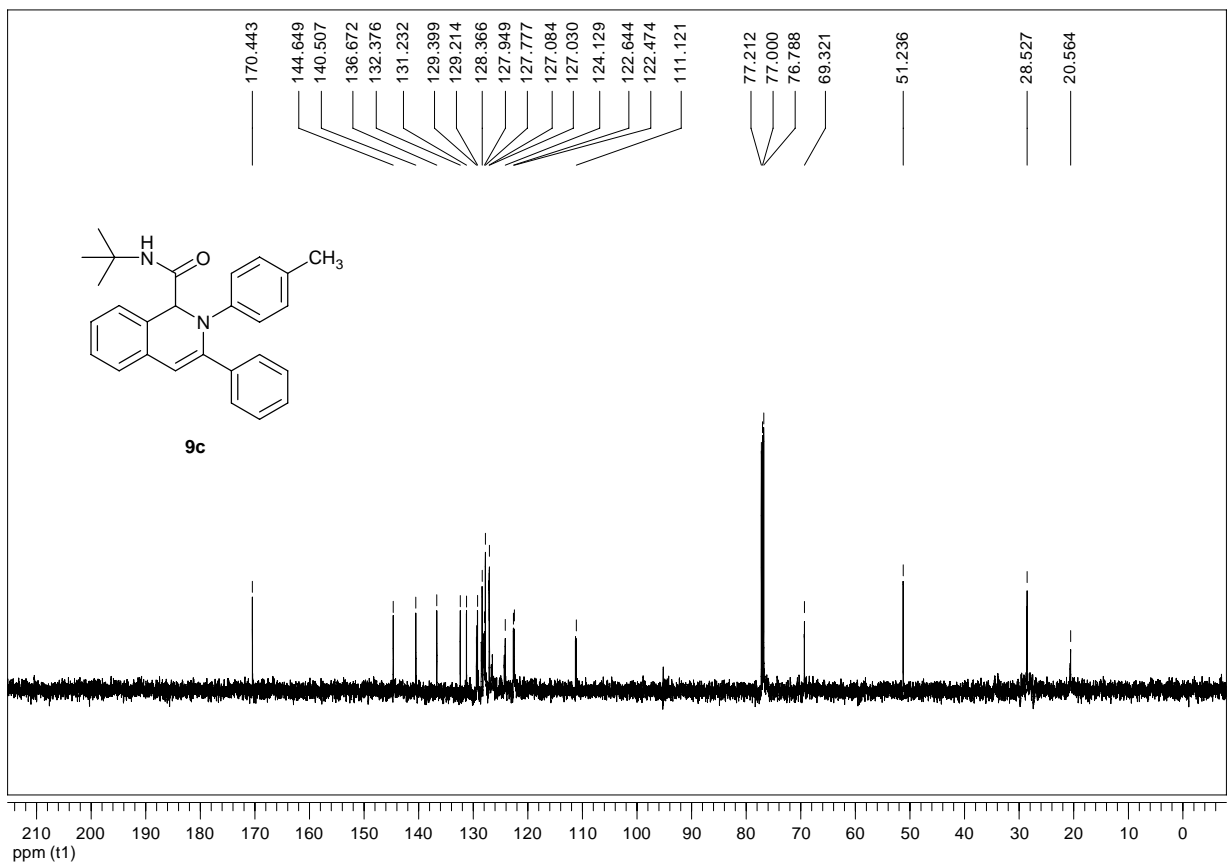

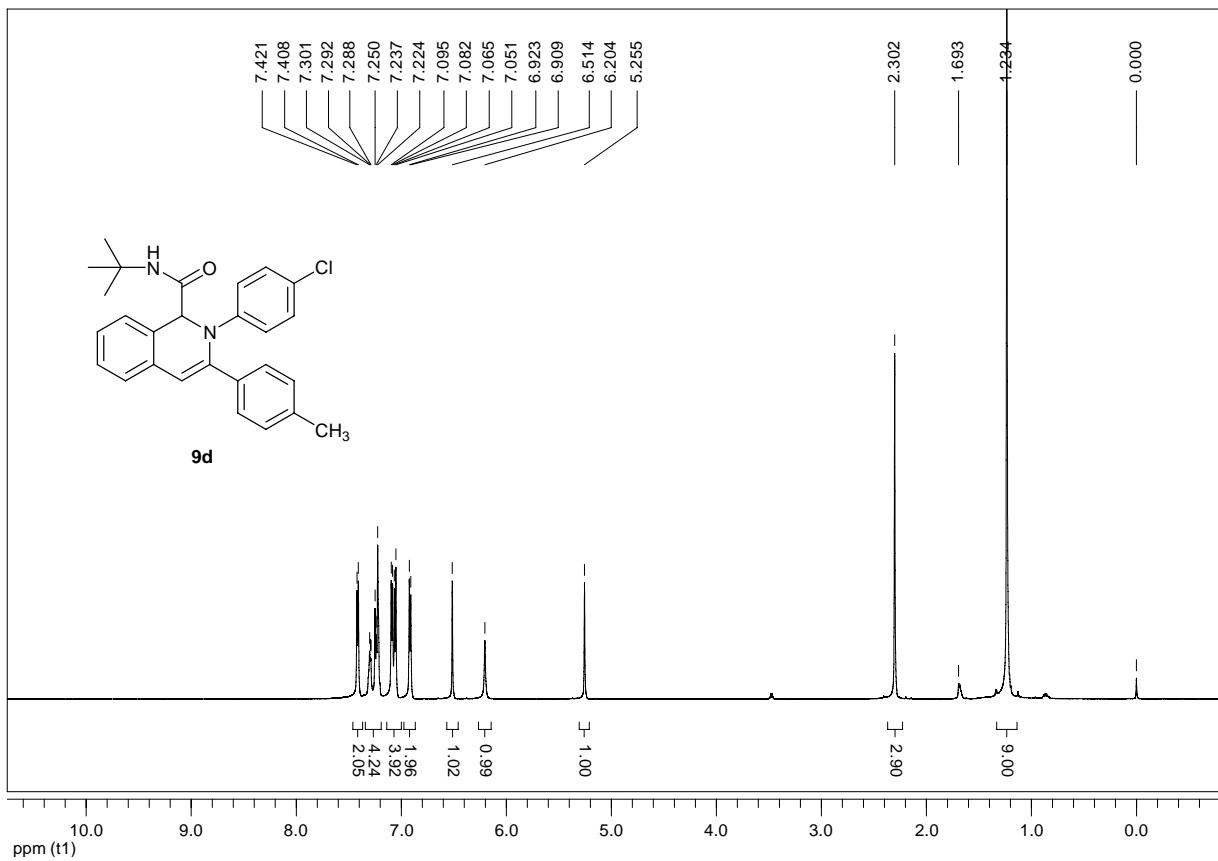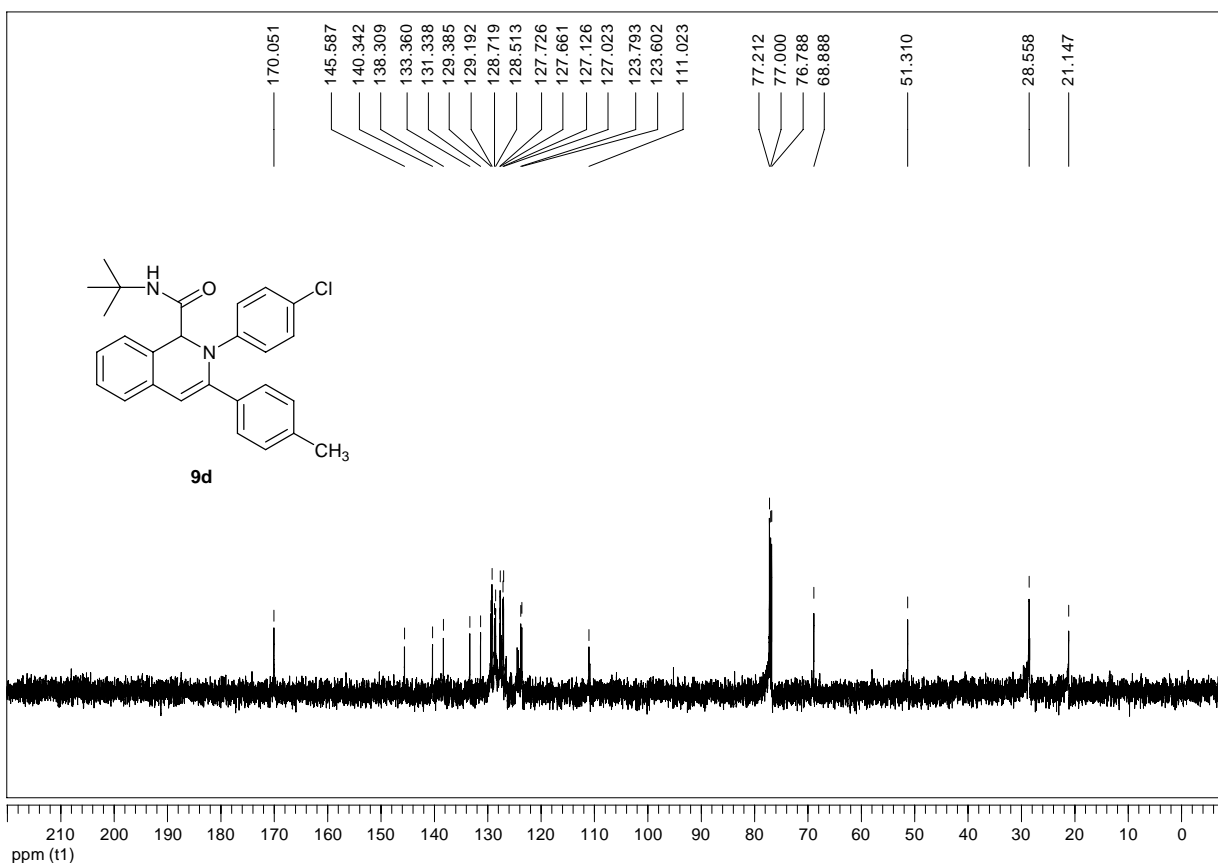

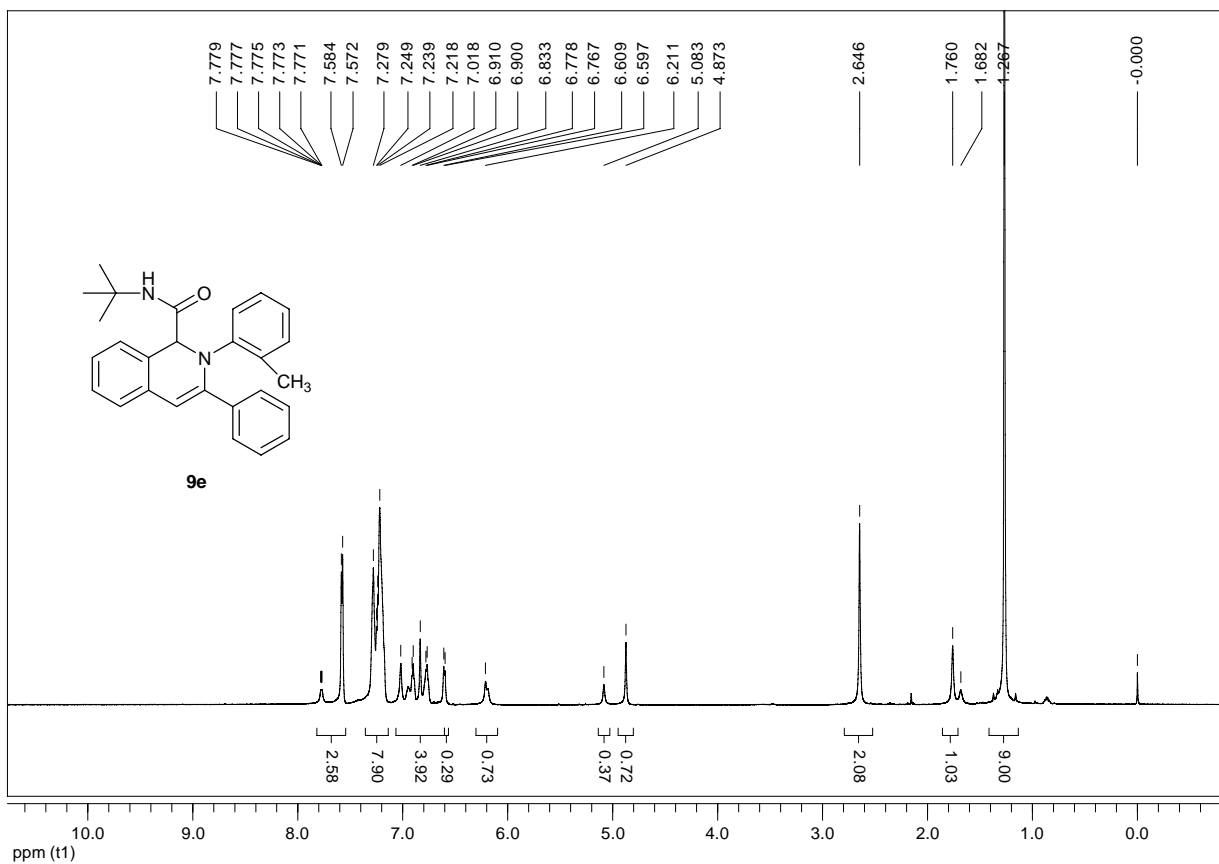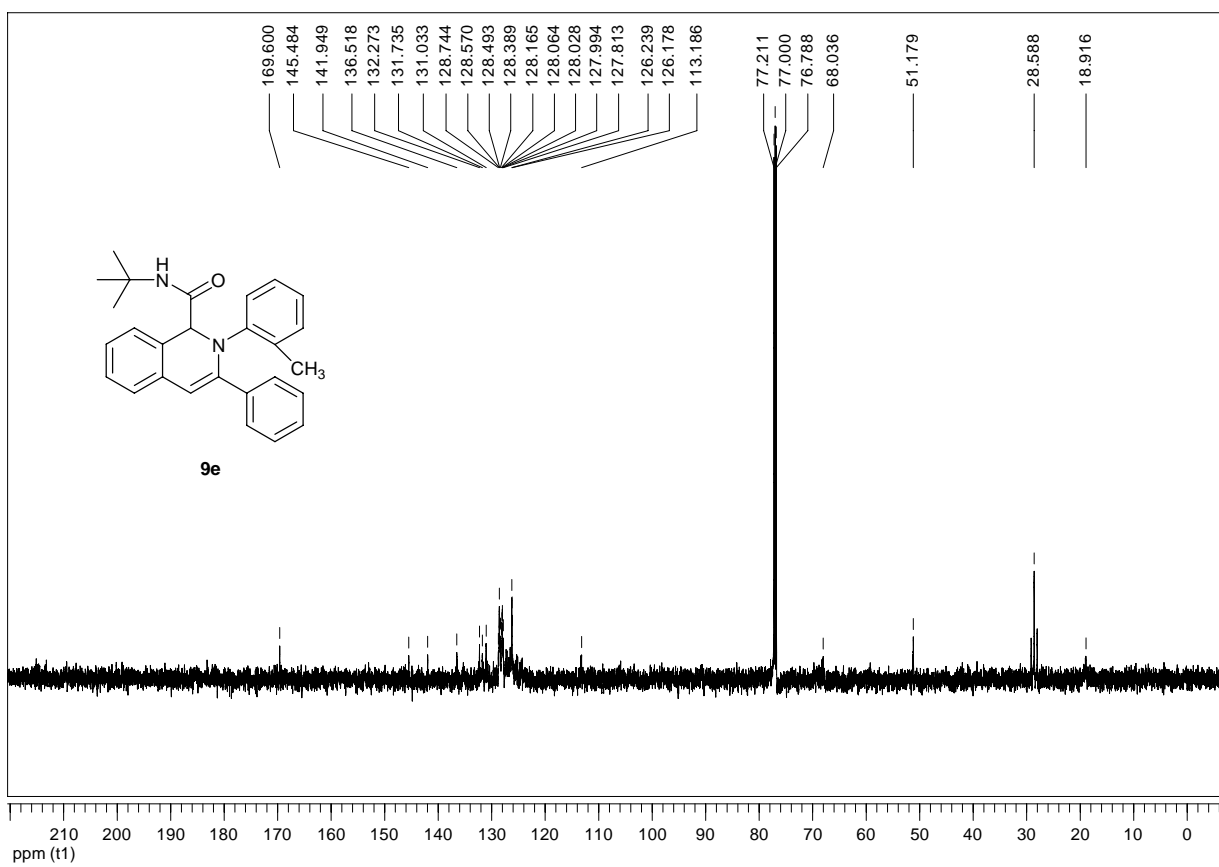

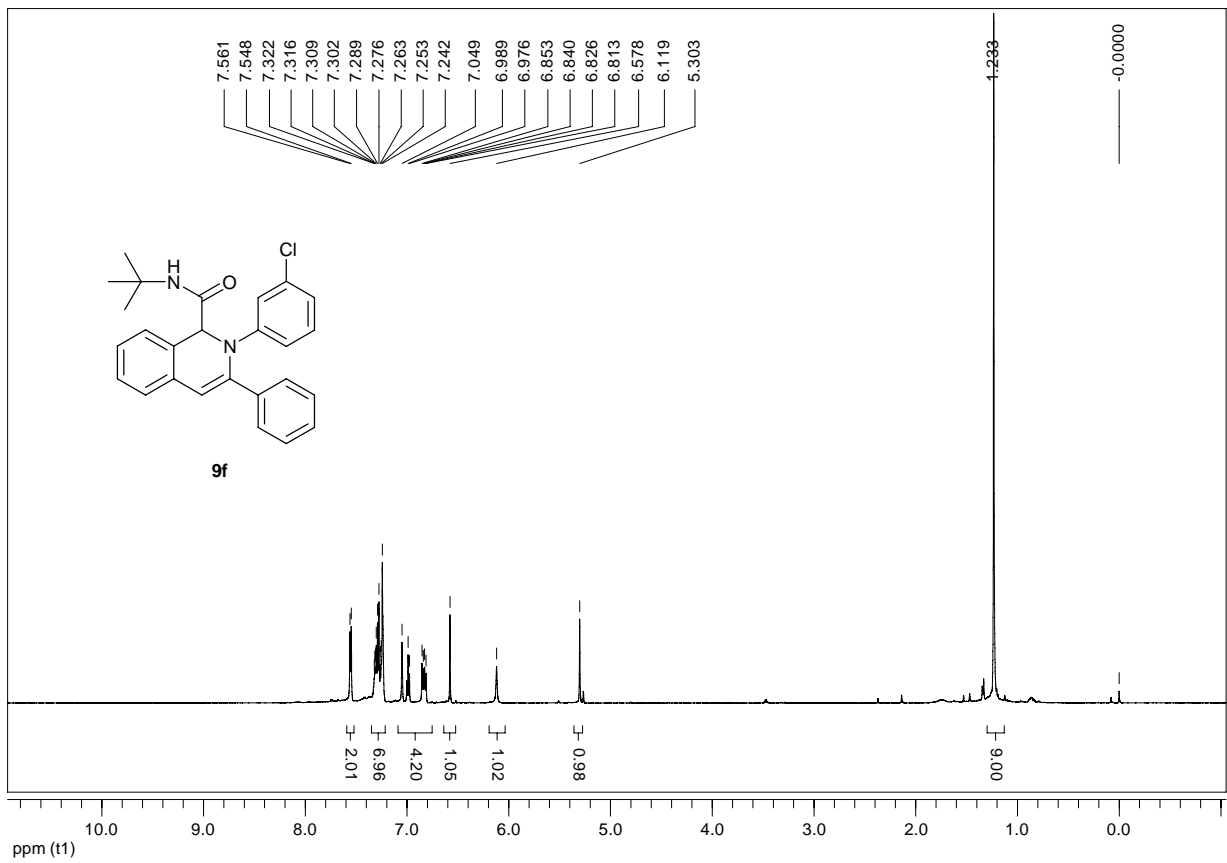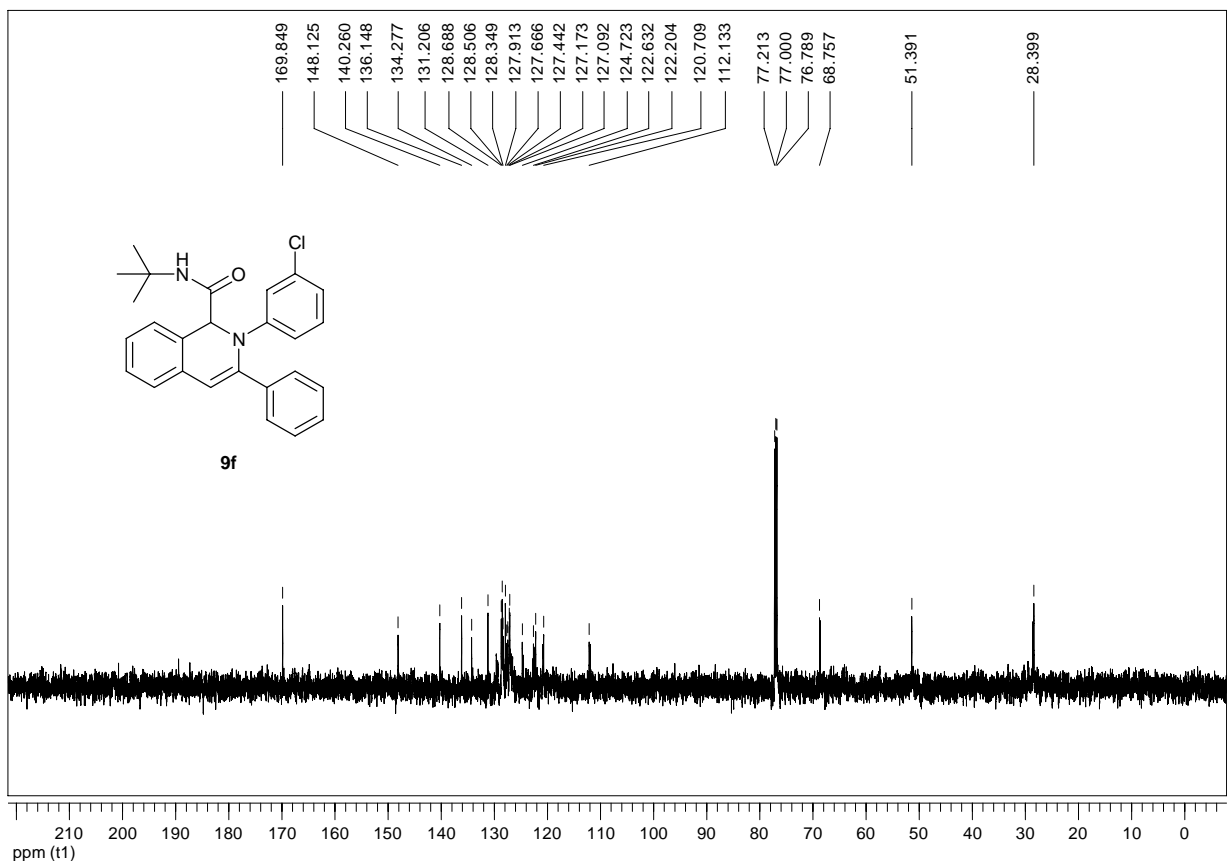



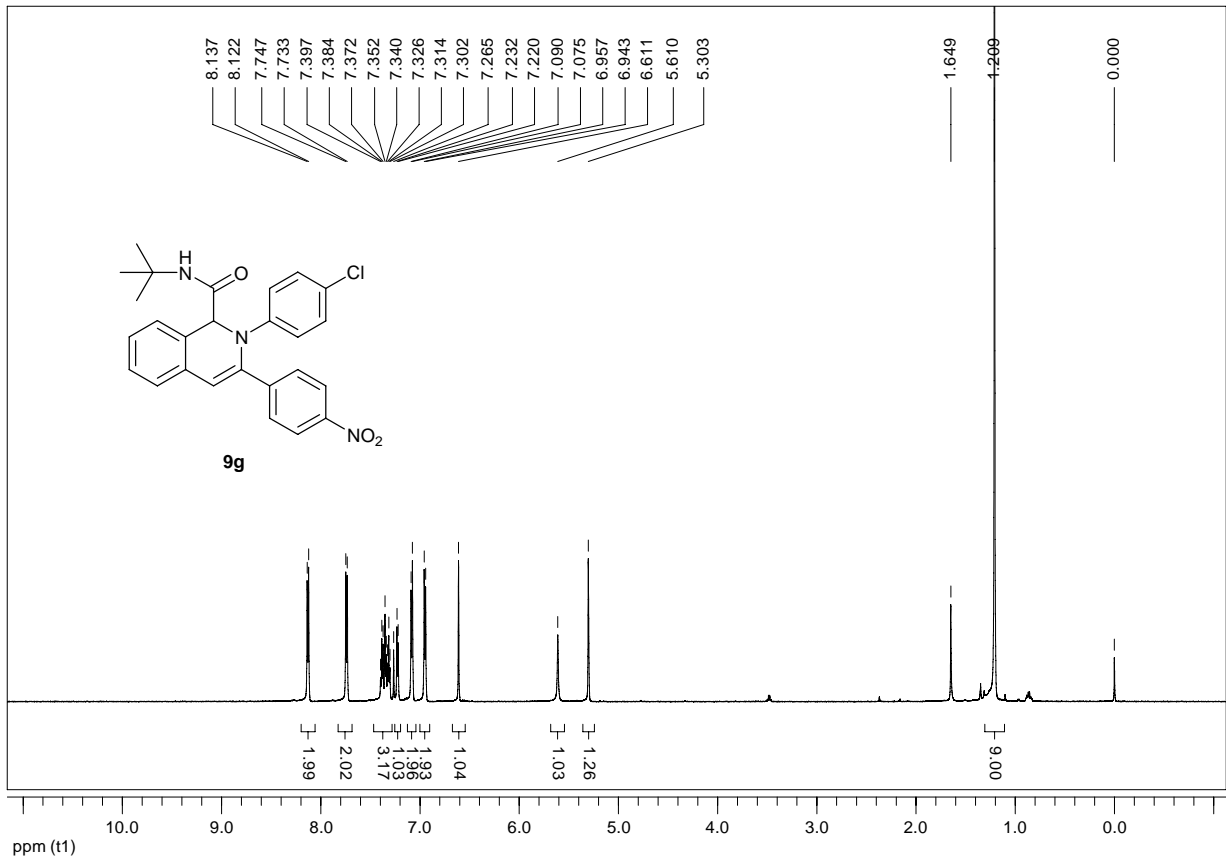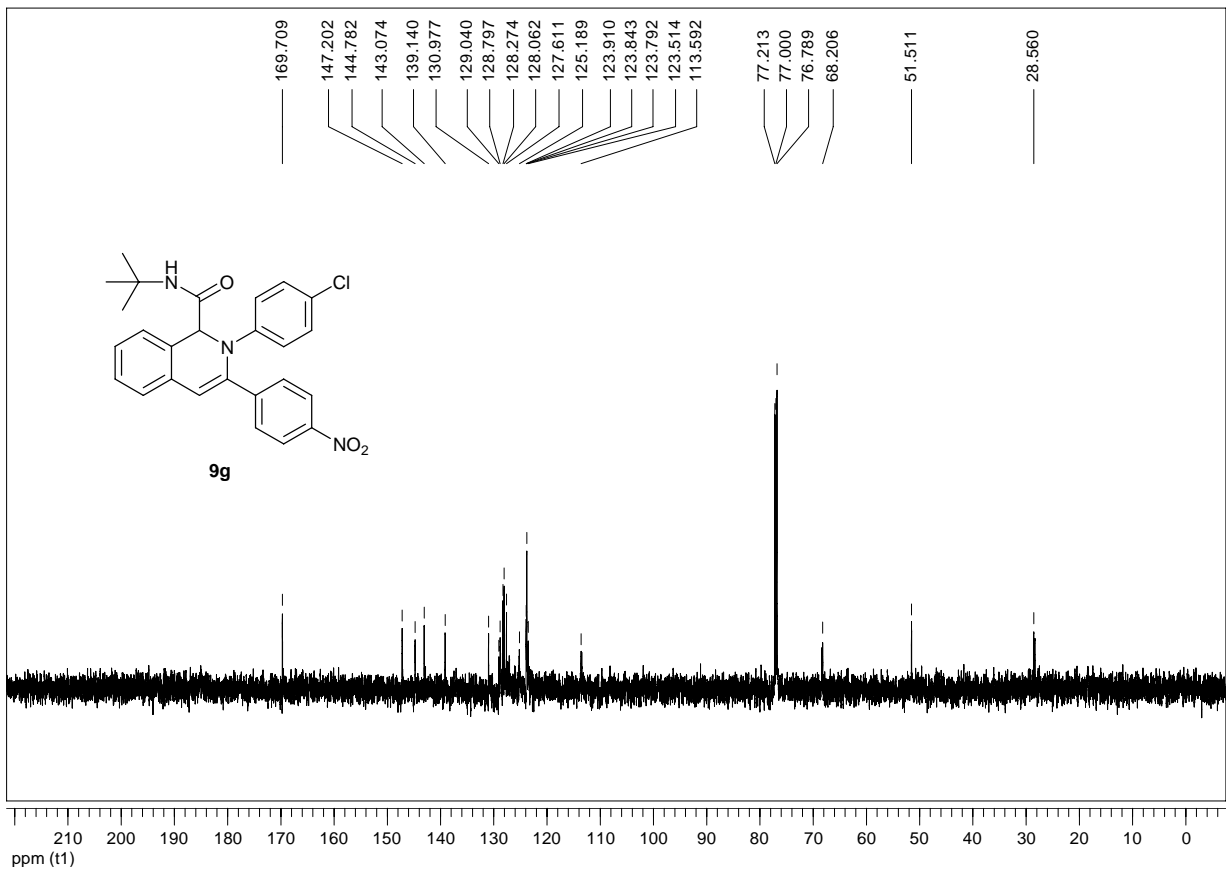

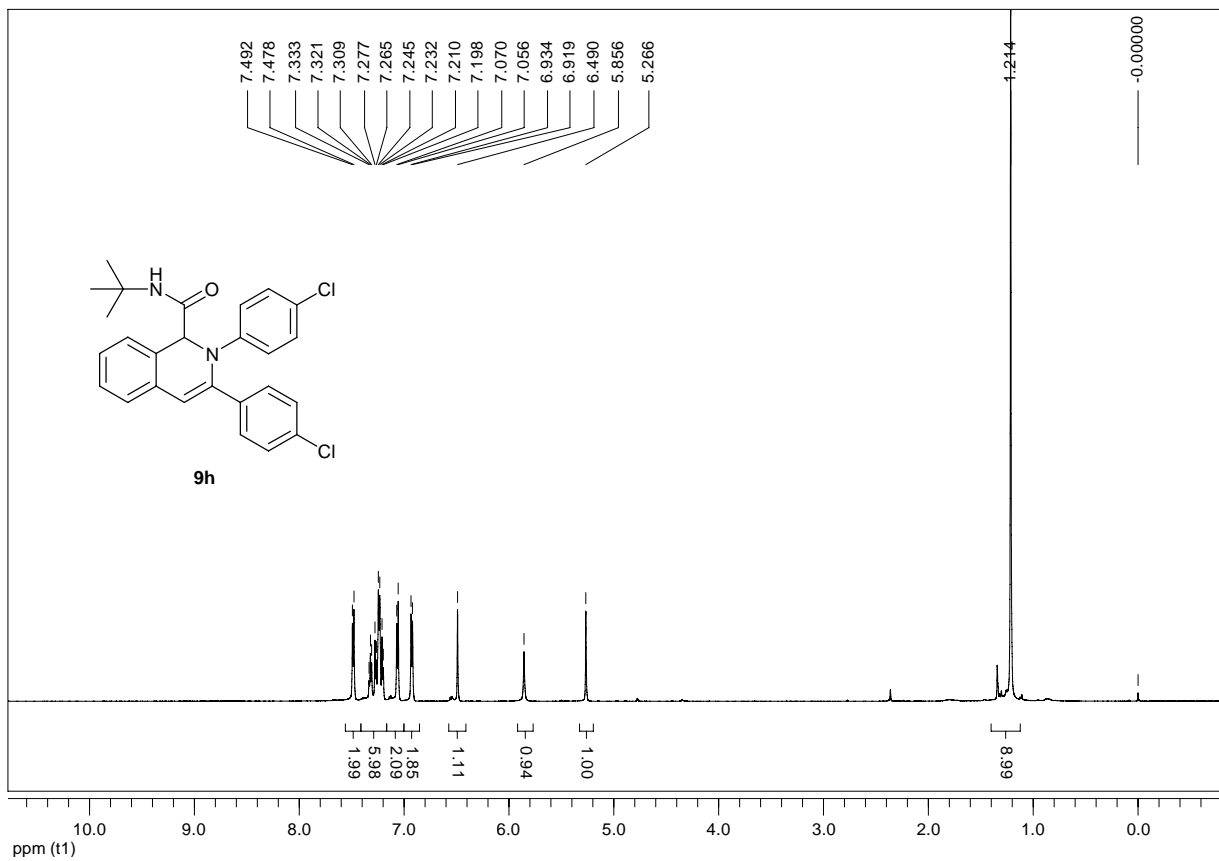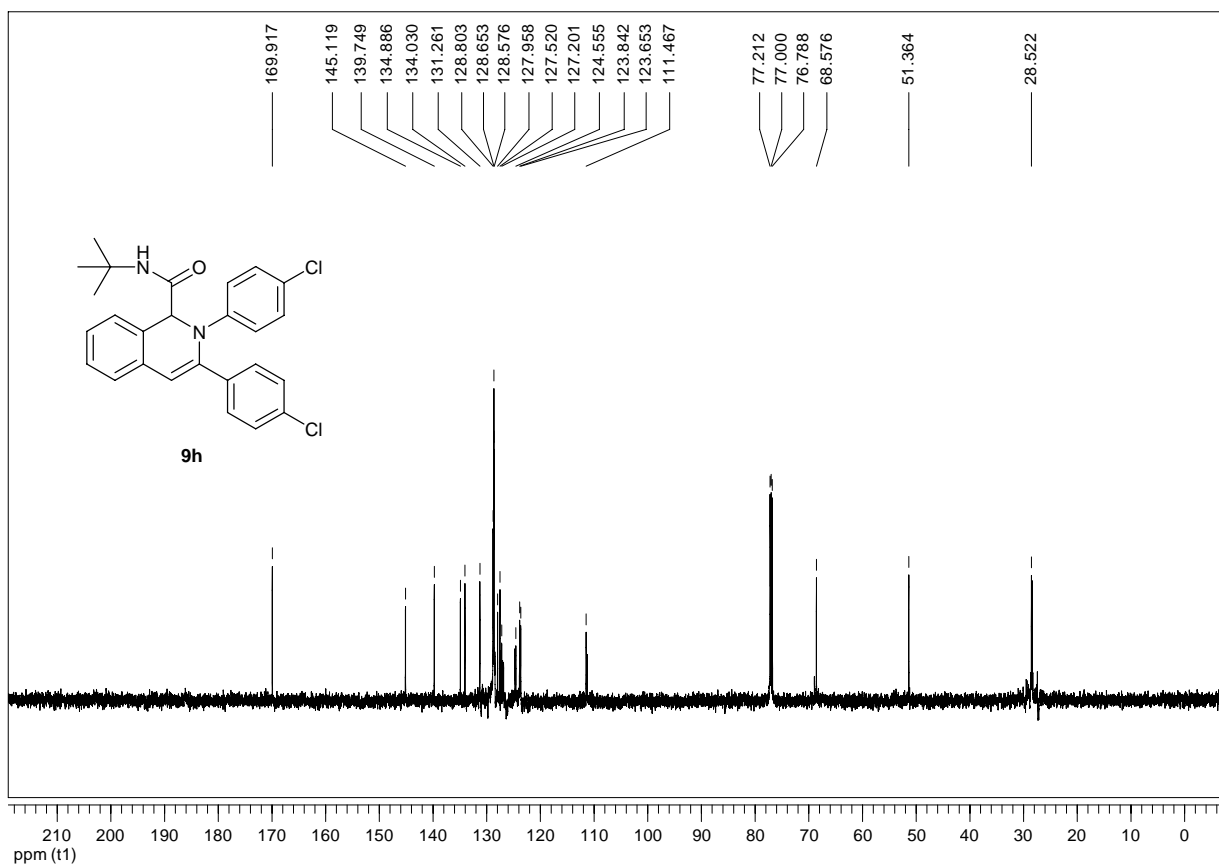

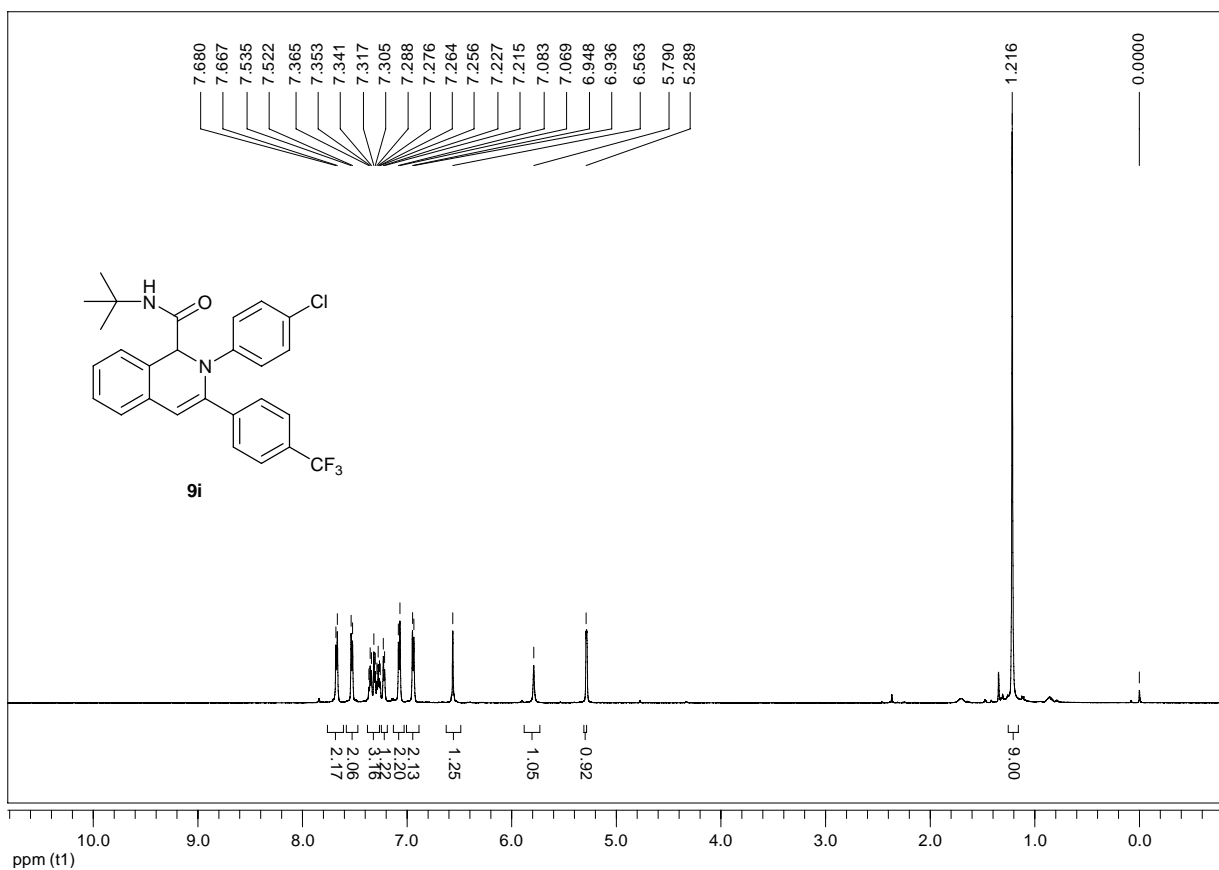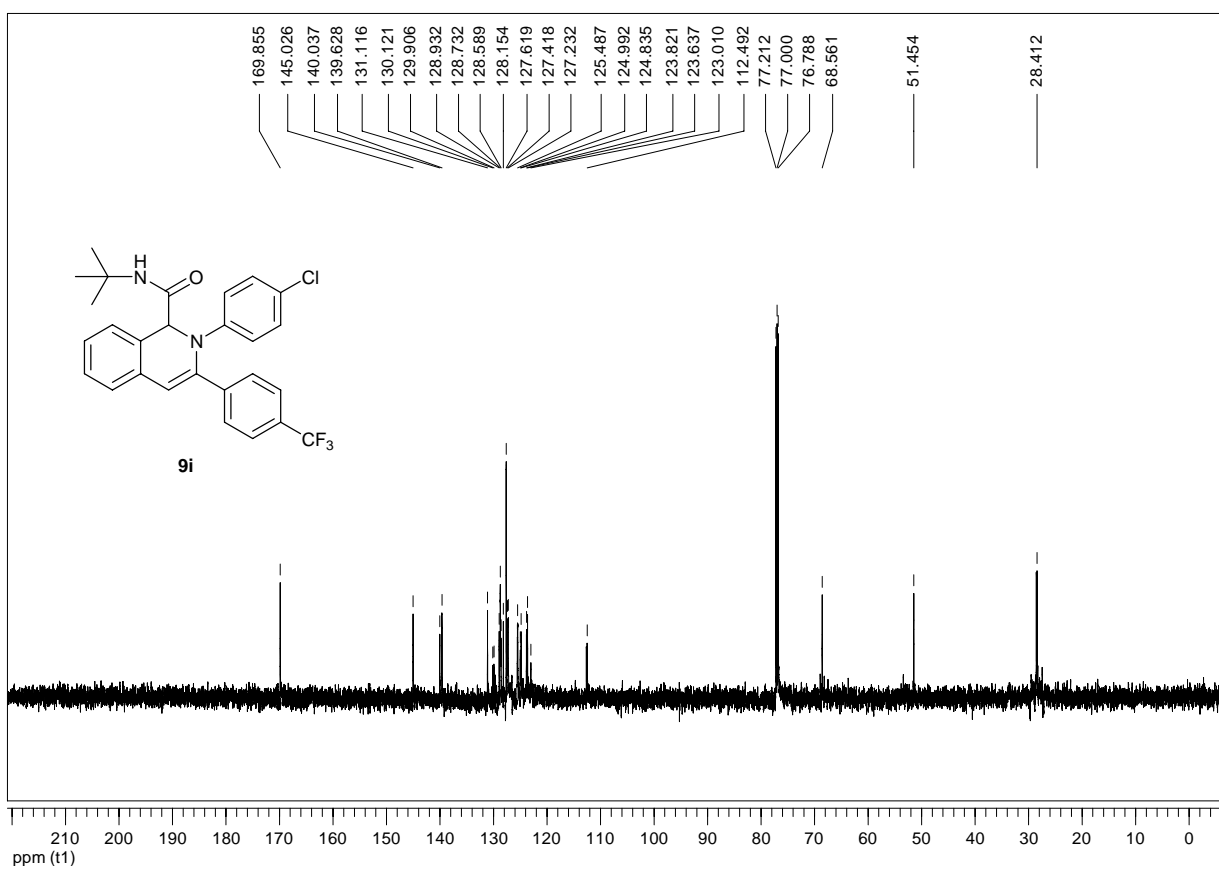

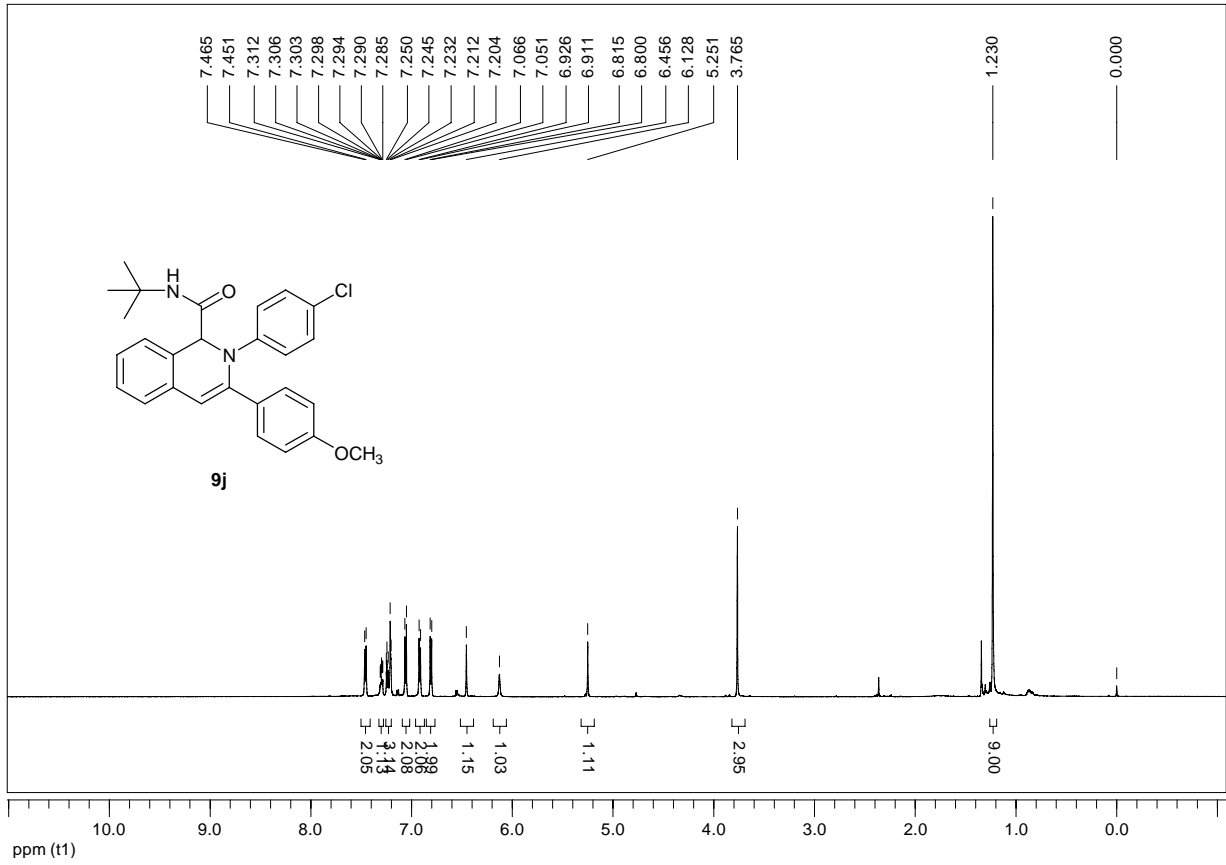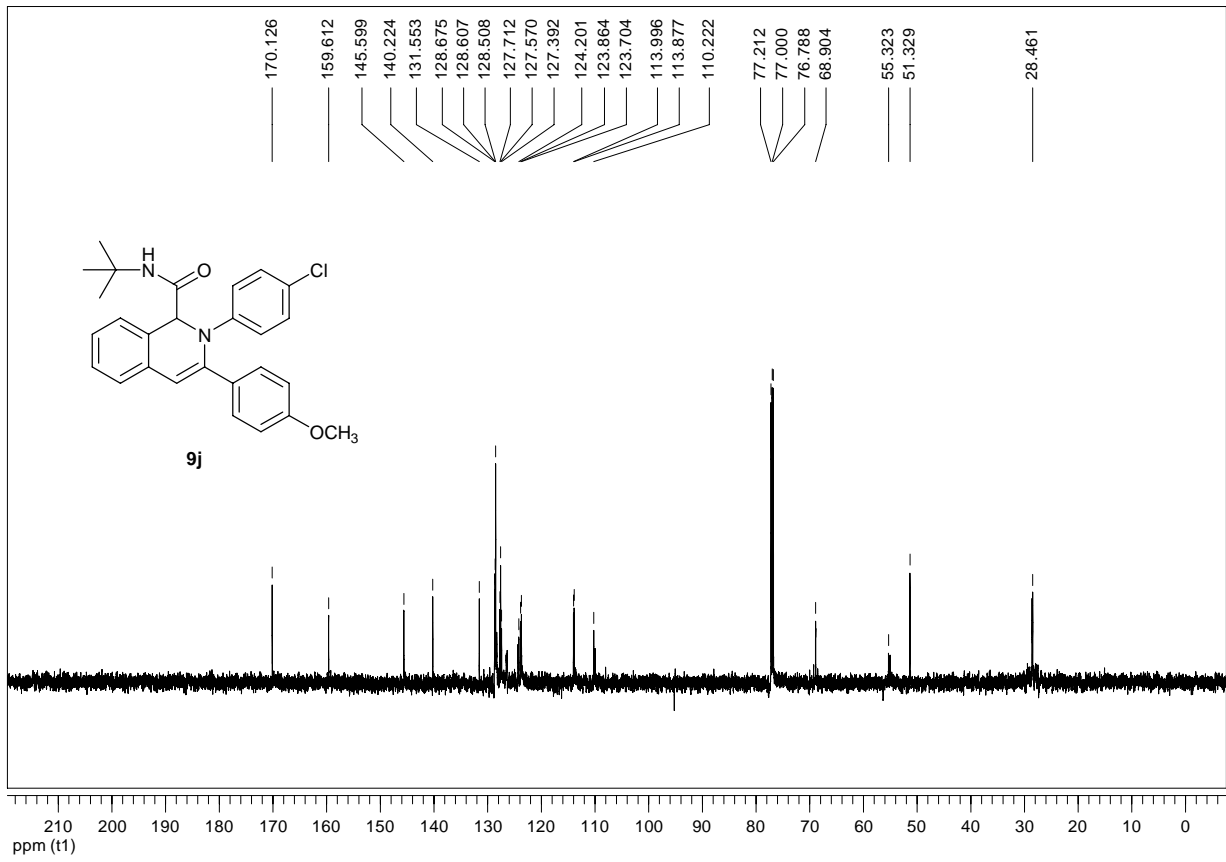

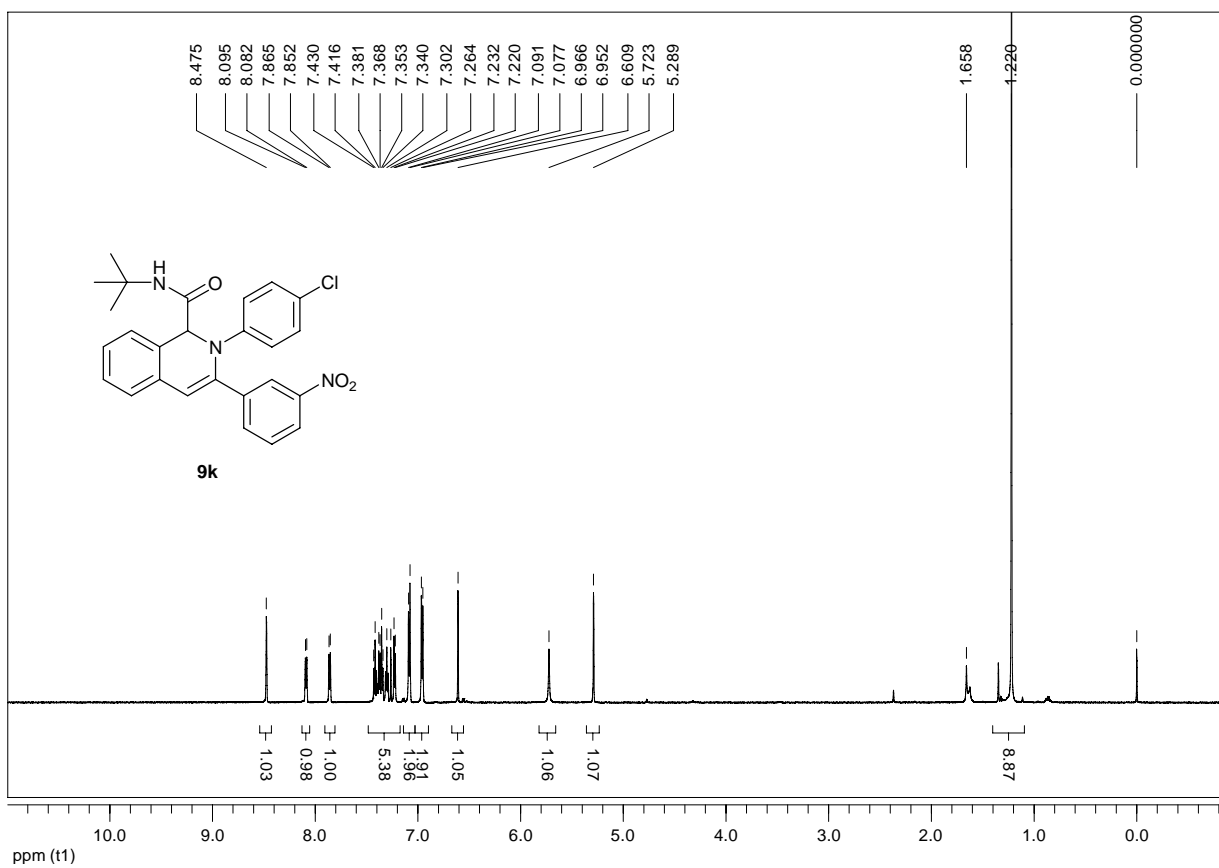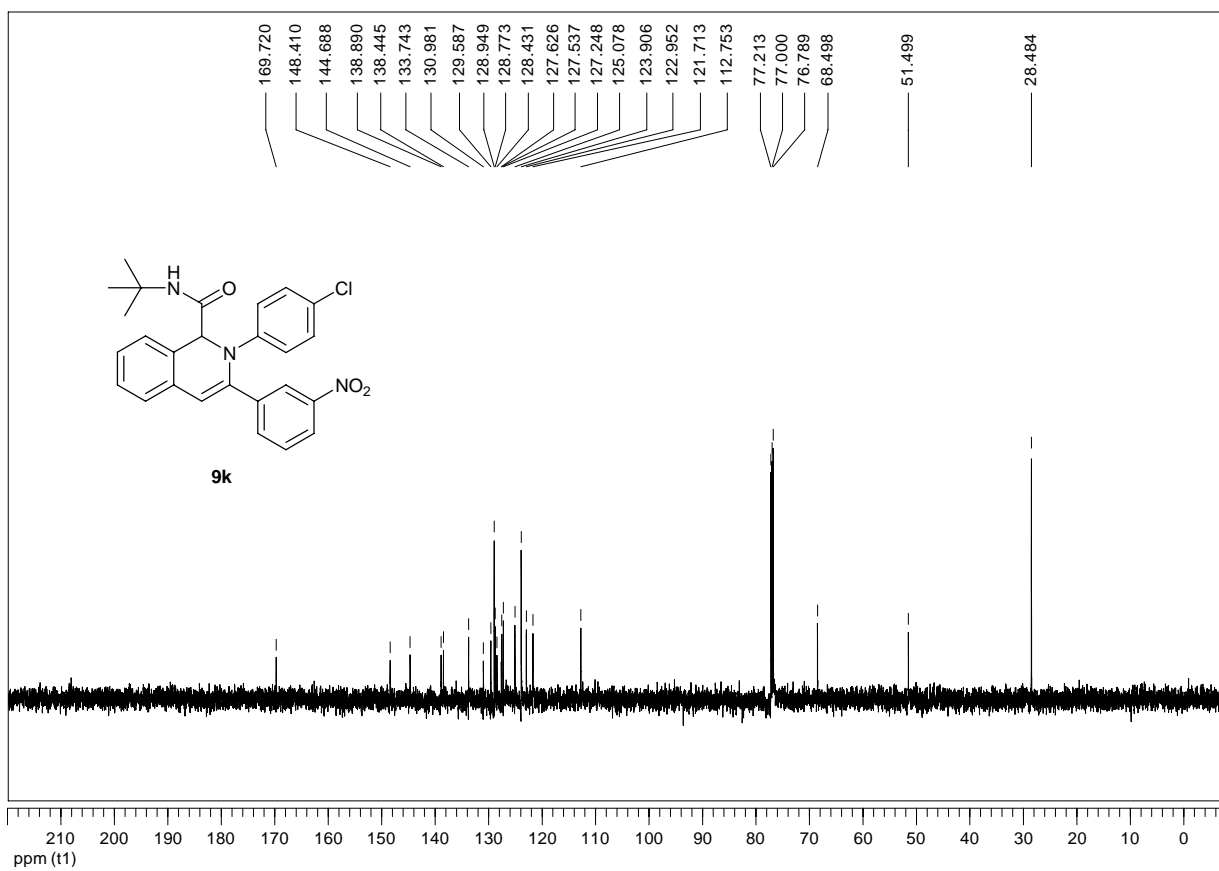

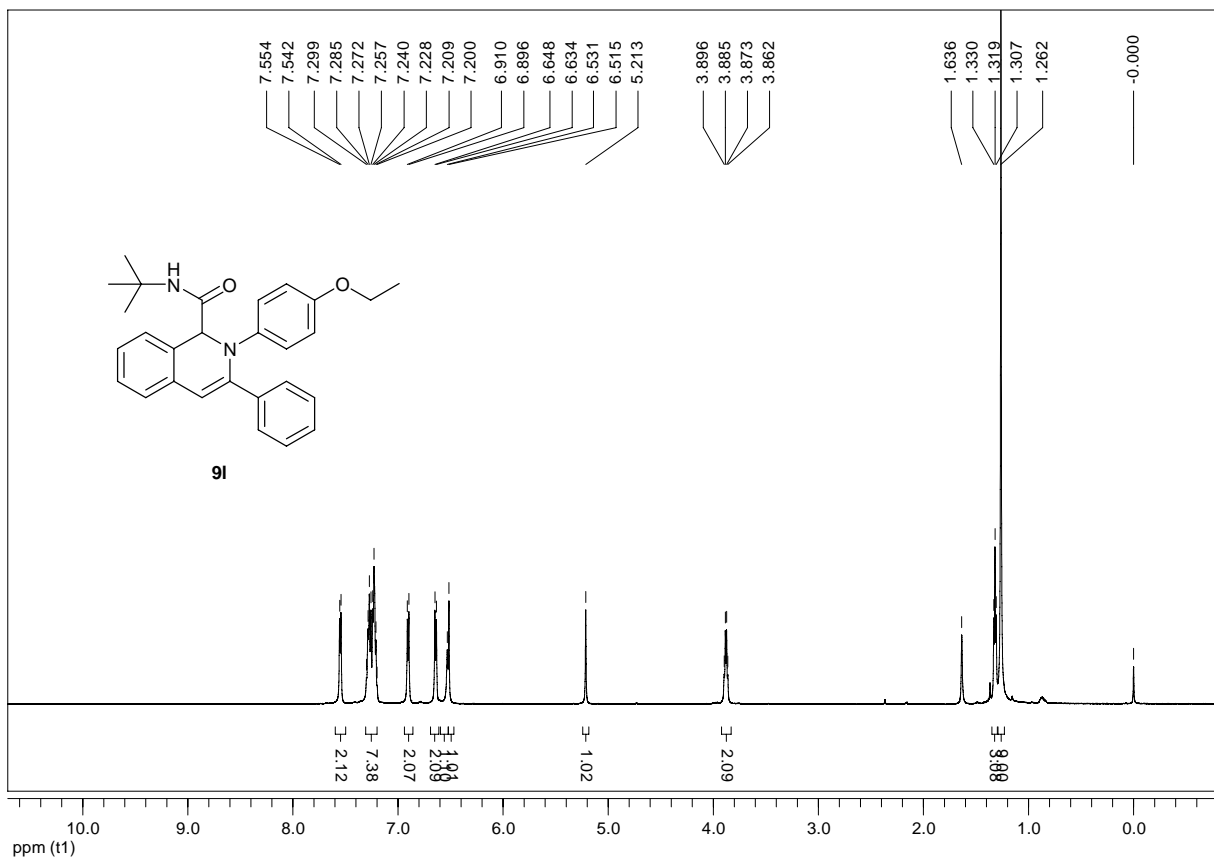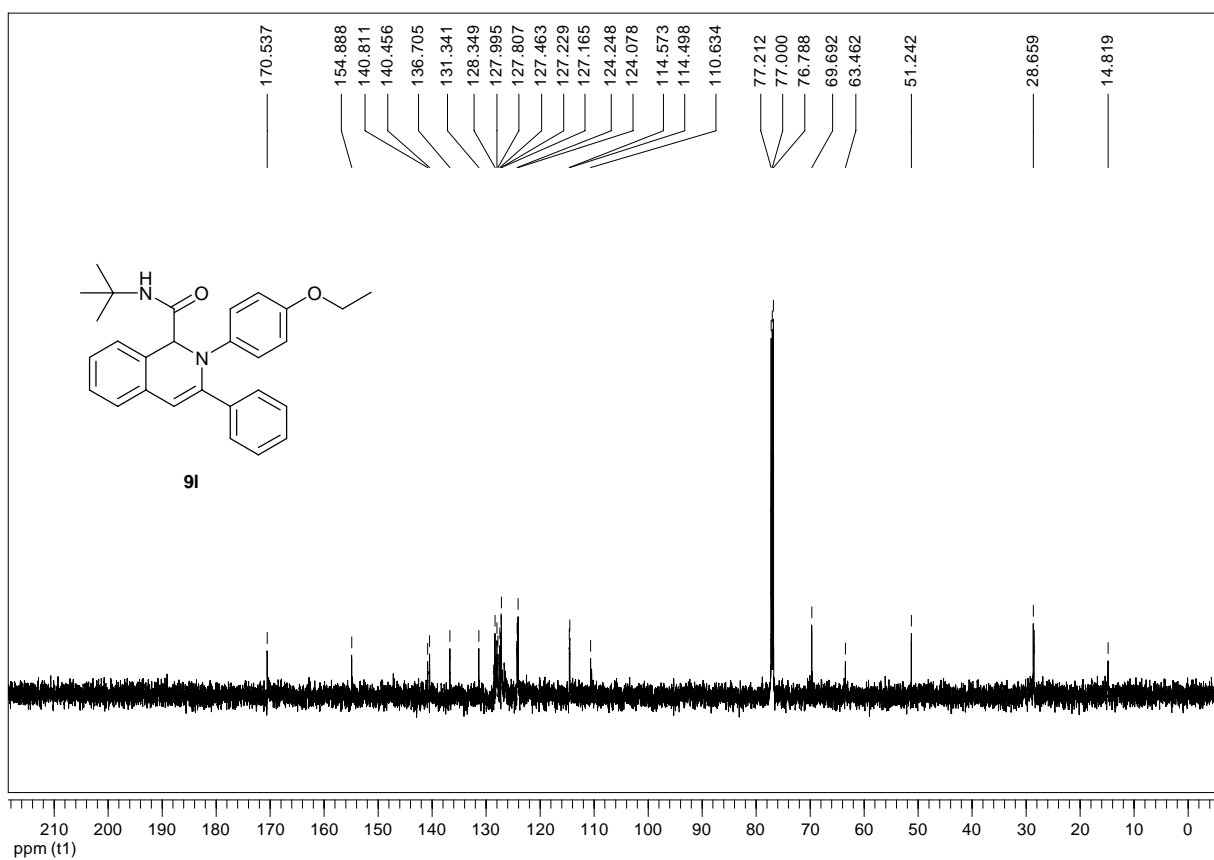

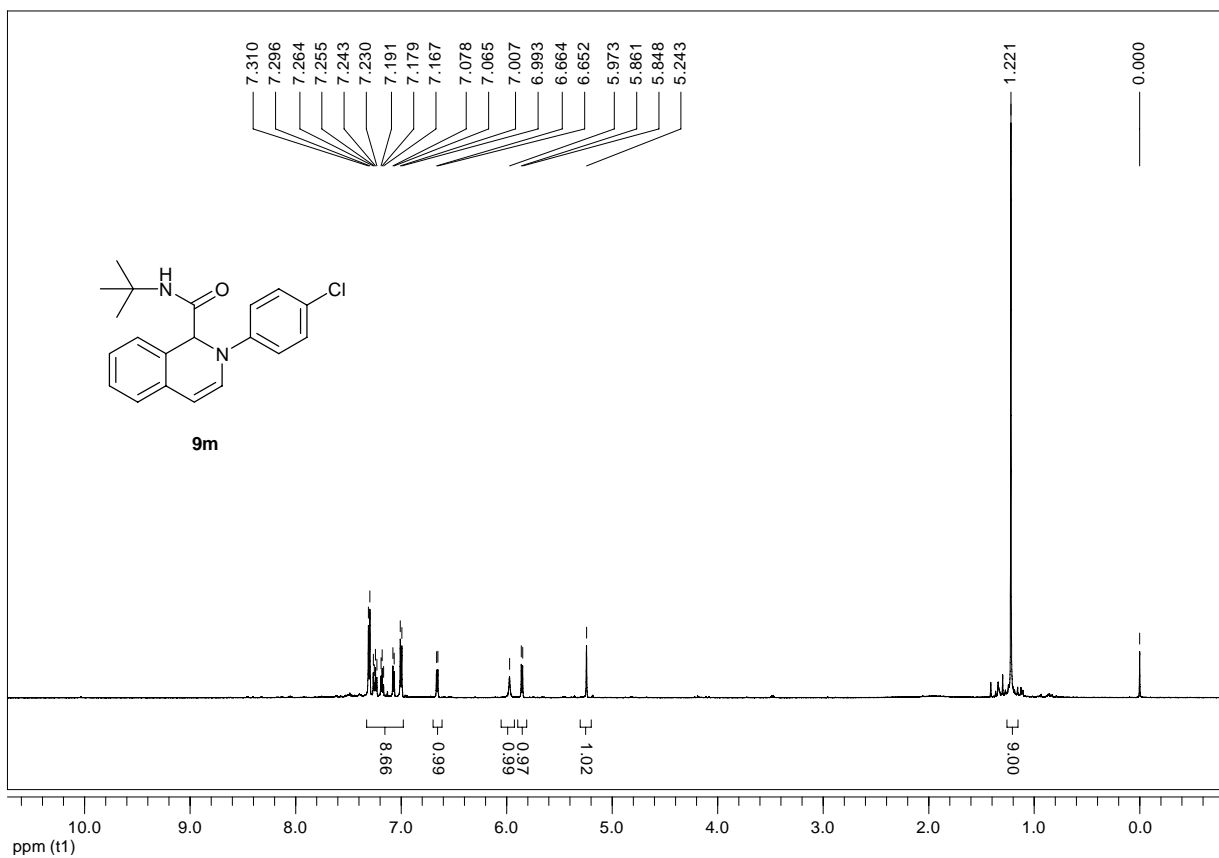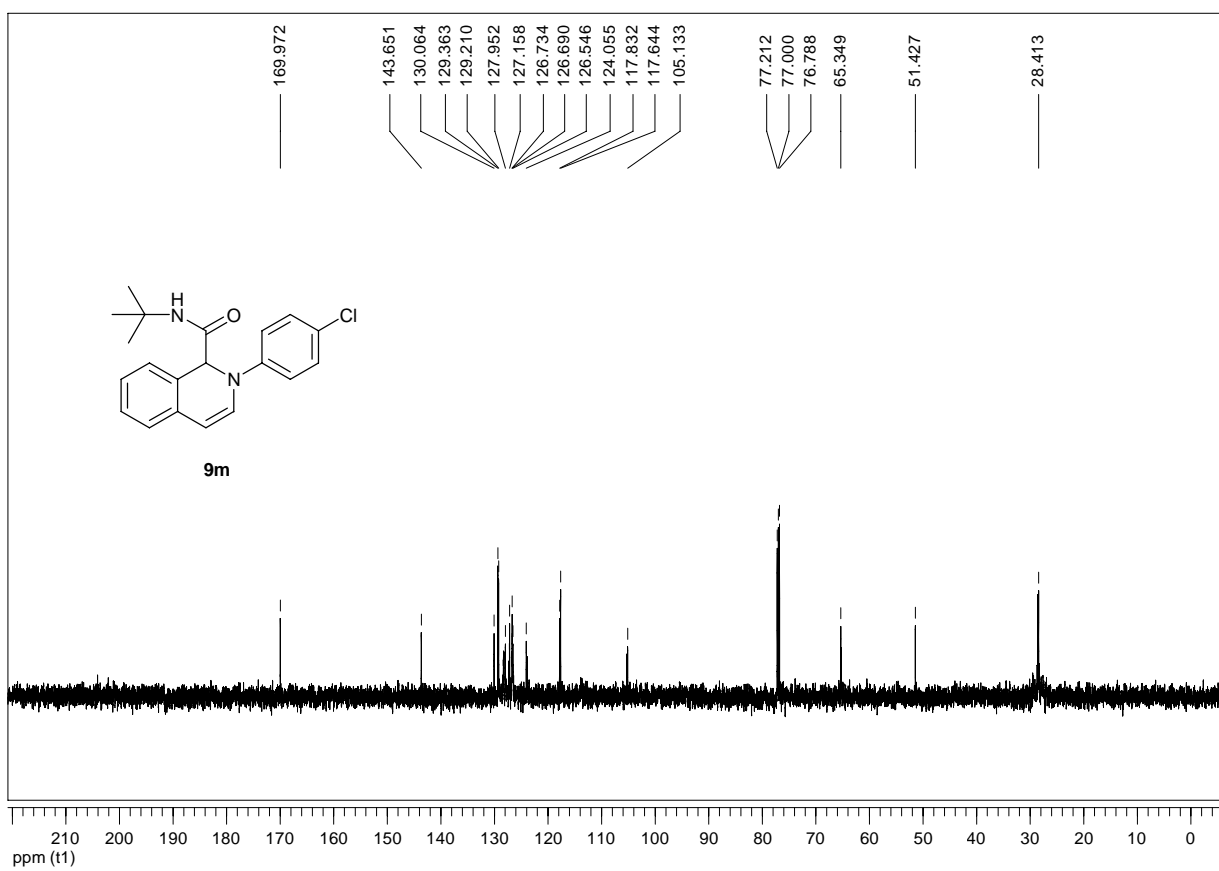

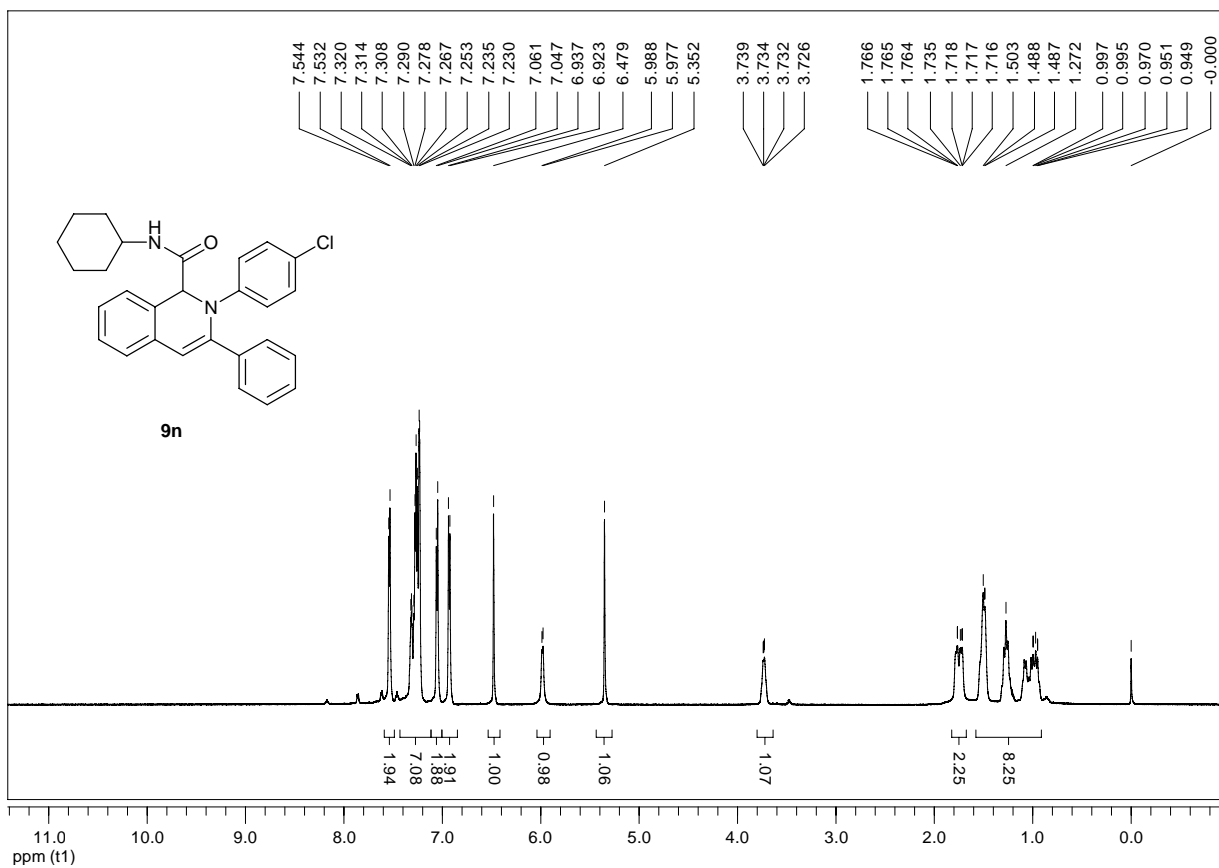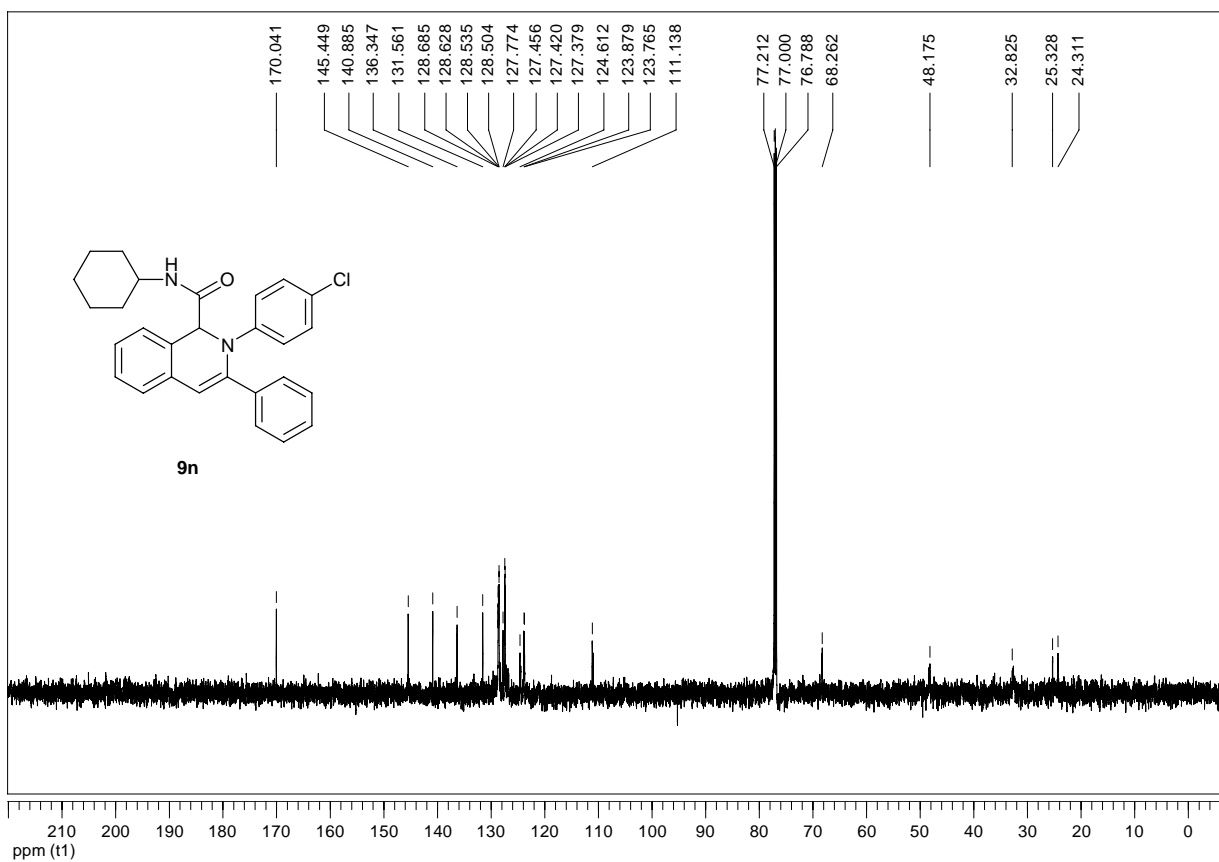



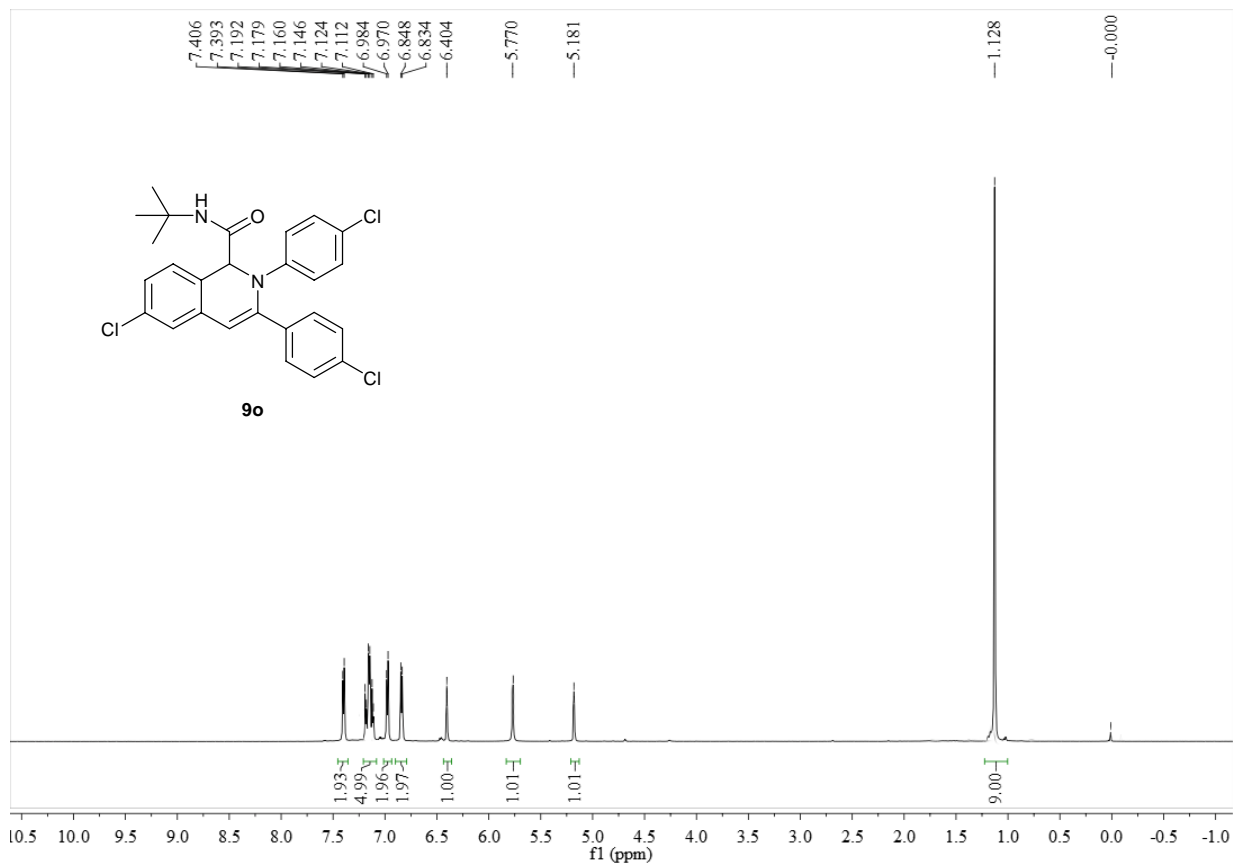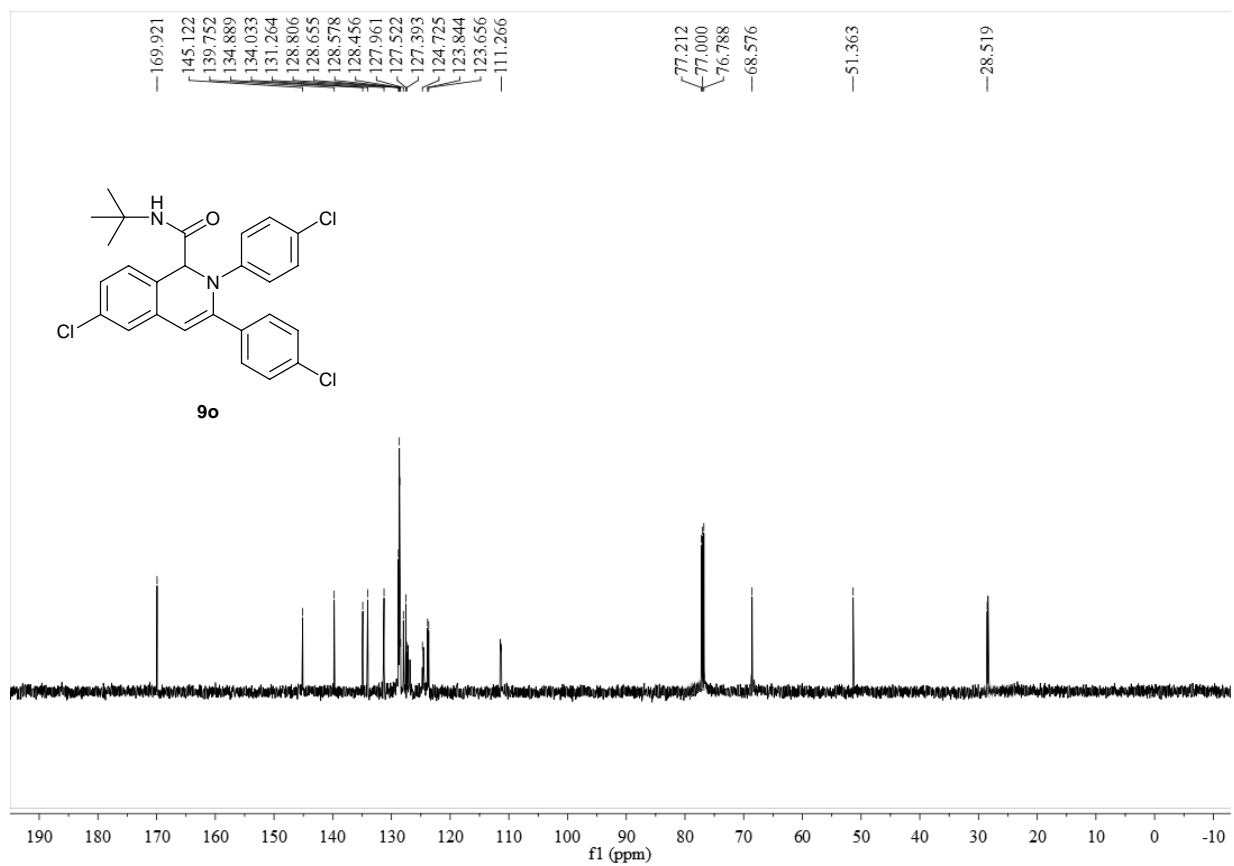

Supplement: c5ob02405f1.pdf [file c5ob02405f1.pdf]
